# Supplementary material for: The global water resources and use model WaterGAP v2.2e: description and evaluation of modifications and new features
Source: Copernicus journal article supplement (doi:10.5194/gmd-2023-213), 2023-11-20
Supplement: Supplementary file 1 [file gmd-2023-213-supplement.pdf]

# The global water resources and use model WaterGAP v2.2e: description and evaluation of modifications and new features - Supplementary material

Hannes Müller Schmied<sup>1,2</sup>, Tim Trautmann<sup>1</sup>, Sebastian Ackermann<sup>1</sup>, Denise Cáceres<sup>1</sup>, Martina Flörke<sup>3</sup>, Helena Gerdener<sup>4</sup>, Ellen Kynast<sup>5</sup>, Thedini Asali Peiris<sup>1</sup>, Leonie Schiebener<sup>1</sup>, Maike Schumacher<sup>6</sup>, and Petra Döll<sup>1,2</sup>

<sup>1</sup>Institute of Physical Geography, Goethe University Frankfurt, Frankfurt am Main, Germany

<sup>2</sup>Senckenberg Leibniz Biodiversity and Climate Research Centre (SBiK-F), Frankfurt am Main, Germany

<sup>3</sup>Engineering Hydrology and Water Resources Management, Ruhr-University of Bochum, Bochum, Germany

<sup>4</sup>Institute of Geodesy and Geoinformation, University of Bonn, Bonn, Germany

<sup>5</sup>Center for Environmental Systems Research, University of Kassel, Kassel, Germany

<sup>6</sup>Geodesy Group, Department of Planning, Aalborg University, Denmark

**Correspondence:** hannes.mueller.schmied@em.uni-frankfurt.de

## S1 Additional tables

This section consists of additional Tables, which might help to understand specific contents of the main text.

## S2 Additional figures

This section consists of additional figures, which might help to understand specific contents of the main text. Please note that only some of the figures are referenced in the main paper, but we are providing also several additional figures to provide insight into specific aspects. The following figures are shown:

- S1-S2: comparison of simulated and observed water storage variations in reservoirs
- S3: effect of the accidental used lower amount of calibration years
- S4-S7: calibration parameters for the other 4 model variants
- S8-S11: comparison of potential water withdrawal uses with AQUASTAT for the other 4 model variants
- S12-S13: efficiency metrics for calibration and validation data (streamflow)

- S14-S23: cumulative distribution of performance metrics for calibration and validation data (streamflow)
- S24-S37: maps with NSE performance indicators and the model variants (streamflow)
- S38-S51: maps with KGE and its components and the model variants (streamflow)
- S52-S55: comparison of TWSA for the other 4 model variants
- S56-S58: seasonality of streamflow and TWSA for 12 large river basins and different combinations of model variants

**Table S1.** List of reservoirs used for comparison between observed and simulated monthly reservoir storage. Data source (column S): a: California Department of Water Resources, b: Bureau of Reclamation, c: Texas Water Development Board

| Reservoir name              | S | Lon     | Lat   | USA state  | Main use    | Area (km <sup>2</sup> ) | Volume (km <sup>3</sup> ) |
|-----------------------------|---|---------|-------|------------|-------------|-------------------------|---------------------------|
| Lake Berryessa              | a | -122.22 | 38.59 | California | irrigation  | 66.6                    | 1.96                      |
| Cascade reservoir           | b | -116.1  | 44.63 | Idaho      | irrigation  | 103.7                   | 0.81                      |
| New Don Pedro reservoir     | a | -120.42 | 37.7  | California | irrigation  | 41.6                    | 2.50                      |
| Hungry Horse reservoir      | b | -114.01 | 48.34 | Montana    | irrigation  | 75.3                    | 3.68                      |
| Amistad lake                | c | -101.05 | 29.45 | Texas      | irrigation  | 131.5                   | 6.33                      |
| Livingston reservoir        | c | -95.02  | 30.63 | Texas      | flood       | 219.6                   | 2.52                      |
| Mohave lake                 | a | -114.66 | 35.47 | California | electricity | 113.4                   | 2.24                      |
| New Melones reservoir       | a | -120.52 | 37.95 | California | irrigation  | 43.2                    | 2.98                      |
| Oroville lake               | a | -121.49 | 39.62 | California | flood       | 68.5                    | 4.37                      |
| Palisades reservoir         | b | -111.12 | 43.24 | Idaho      | irrigation  | 64.5                    | 1.48                      |
| Pine Flat lake              | a | -119.32 | 36.83 | California | flood       | 15.4                    | 1.23                      |
| Powell lake                 | a | -110.73 | 37.37 | California | electricity | 647.8                   | 25.07                     |
| Richland-Chambers reservoir | c | -96.1   | 31.97 | Texas      | recreation  | 156.5                   | 2.15                      |
| Sam Rayburn reservoir       | c | -94.11  | 31.07 | Texas      | supply      | 380.1                   | 7.82                      |
| San Luis reservoir          | a | -121.13 | 37.05 | California | irrigation  | 50                      | 2.42                      |
| Toledo Bend reservoir       | c | -93.57  | 31.18 | Texas      | electricity | 599.6                   | 6.29                      |

**Table S2.** Global-scale (excluding Antarctica and Greenland) water balance components for different time spans as simulated with WaterGAP 2.2d with gswp3-w5e5. All units in  $km^3 yr^{-1}$ . Long-term average volume balance error is calculated as the difference of component 1 and the sum of components 2,3 and 8.

| No. | Component                                 | 1961-1990 | 1971-2000 | 1981-2010 | 1991-2019 | 2001-2019 |
|-----|-------------------------------------------|-----------|-----------|-----------|-----------|-----------|
| 1   | Precipitation                             | 110637    | 111279    | 111351    | 111575    | 111657    |
| 2   | Actual evapotranspiration <sup>1</sup>    | 70577     | 70983     | 71042     | 71184     | 71245     |
| 3   | Streamflow into oceans and inland sinks   | 40045     | 40305     | 40366     | 40495     | 40537     |
| 4   | Inflow into inland sinks <sup>2</sup>     | 773       | 791       | 791       | 837       | 842       |
| 5   | Actual consumptive water use <sup>3</sup> | 917       | 1063      | 1212      | 1324      | 1388      |
| 6   | Actual net abstraction from surface water | 1024      | 1169      | 1315      | 1420      | 1470      |
| 7   | Actual net abstraction from groundwater   | -107      | -106      | -103      | -96       | -83       |
| 8   | Change of total water storage             | 14        | -9        | -56       | -104      | -125      |
| 9   | Long-term average volume balance error    | 0.37      | 0.25      | 0.13      | 0.03      | 0.01      |

<sup>1</sup> including actual consumptive water use<sup>2</sup> streamflow that flows into inland sinks; the simulated streamflow of inland sinks is added to actual evapotranspiration<sup>3</sup> sum of rows 6 and 7**Table S3.** Global-scale (excluding Antarctica and Greenland) water balance components for different time spans as simulated with WaterGAP 2.2e with 20crv3-era5. All units in  $km^3 yr^{-1}$ . Long-term average volume balance error is calculated as the difference of component 1 and the sum of components 2,3 and 8.

| No. | Component                                 | 1961-1990 | 1971-2000 | 1981-2010 | 1991-2019 | 2001-2021 |
|-----|-------------------------------------------|-----------|-----------|-----------|-----------|-----------|
| 1   | Precipitation                             | 120548    | 121272    | 120244    | 118878    | 117604    |
| 2   | Actual evapotranspiration <sup>1</sup>    | 79976     | 80514     | 79900     | 78886     | 77988     |
| 3   | Streamflow into oceans                    | 40540     | 40766     | 40441     | 40127     | 39759     |
| 4   | Inflow into inland sinks <sup>2</sup>     | 1106      | 1086      | 1031      | 992       | 955       |
| 5   | Actual consumptive water use <sup>3</sup> | 852       | 984       | 1123      | 1230      | 1295      |
| 6   | Actual net abstraction from surface water | 962       | 1094      | 1241      | 1347      | 1407      |
| 7   | Actual net abstraction from groundwater   | -110      | -110      | -118      | -118      | -112      |
| 8   | Change of total water storage             | 32        | -8        | -97       | -135      | -143      |
| 9   | Long-term average volume balance error    | -0.34     | -0.21     | -0.08     | 0.04      | 0.02      |

<sup>1</sup> including actual consumptive water use<sup>2</sup> streamflow that flows into inland sinks; the simulated streamflow of inland sinks is added to actual evapotranspiration<sup>3</sup> sum of rows 6 and 7

**Table S4.** Global-scale (excluding Antarctica and Greenland) water balance components for different time spans as simulated with WaterGAP 2.2e with 20crv3-w5e5. All units in  $km^3 yr^{-1}$ . Long-term average volume balance error is calculated as the difference of component 1 and the sum of components 2,3 and 8.

| No. | Component                                 | 1961-1990 | 1971-2000 | 1981-2010 | 1991-2019 | 2001-2019 |
|-----|-------------------------------------------|-----------|-----------|-----------|-----------|-----------|
| 1   | Precipitation                             | 111227    | 111284    | 111350    | 111574    | 111655    |
| 2   | Actual evapotranspiration <sup>1</sup>    | 71456     | 71834     | 71923     | 72106     | 72170     |
| 3   | Streamflow into oceans                    | 39769     | 39461     | 39478     | 39557     | 39591     |
| 4   | Inflow into inland sinks <sup>2</sup>     | 881       | 831       | 789       | 835       | 840       |
| 5   | Actual consumptive water use <sup>3</sup> | 899       | 1039      | 1183      | 1293      | 1354      |
| 6   | Actual net abstraction from surface water | 1022      | 1167      | 1320      | 1428      | 1479      |
| 7   | Actual net abstraction from groundwater   | -123      | -128      | -136      | -135      | -125      |
| 8   | Change of total water storage             | 2         | -11       | -51       | -90       | -106      |
| 9   | Long-term average volume balance error    | -0.45     | -0.34     | -0.21     | -0.08     | -0.07     |

<sup>1</sup> including actual consumptive water use<sup>2</sup> streamflow that flows into inland sinks; the simulated streamflow of inland sinks is added to actual evapotranspiration<sup>3</sup> sum of rows 6 and 7**Table S5.** Global-scale (excluding Antarctica and Greenland) water balance components for different time spans as simulated with WaterGAP 2.2e with gswp3-era5. All units in  $km^3 yr^{-1}$ . Long-term average volume balance error is calculated as the difference of component 1 and the sum of components 2,3 and 8.

| No. | Component                                 | 1961-1990 | 1971-2000 | 1981-2010 | 1991-2019 | 2001-2022 |
|-----|-------------------------------------------|-----------|-----------|-----------|-----------|-----------|
| 1   | Precipitation                             | 120374    | 121389    | 120244    | 118878    | 117569    |
| 2   | Actual evapotranspiration <sup>1</sup>    | 80079     | 80546     | 79851     | 78843     | 77895     |
| 3   | Streamflow into oceans                    | 40255     | 40853     | 40493     | 40169     | 39844     |
| 4   | Inflow into inland sinks <sup>2</sup>     | 980       | 1044      | 1038      | 1000      | 957       |
| 5   | Actual consumptive water use <sup>3</sup> | 854       | 987       | 1129      | 1237      | 1306      |
| 6   | Actual net abstraction from surface water | 965       | 1099      | 1249      | 1359      | 1422      |
| 7   | Actual net abstraction from groundwater   | -111      | -112      | -121      | -121      | -116      |
| 8   | Change of total water storage             | 40        | -10       | -100      | -134      | -169      |
| 9   | Long-term average volume balance error    | -0.54     | -0.40     | -0.24     | -0.11     | -0.10     |

<sup>1</sup> including actual consumptive water use<sup>2</sup> streamflow that flows into inland sinks; the simulated streamflow of inland sinks is added to actual evapotranspiration<sup>3</sup> sum of rows 6 and 7**Table S6.** Globally aggregated (excluding Antarctica and Greenland) water storage component changes during different time periods as simulated by WaterGAP 2.2d with gswp3-w5e5. All units in  $km^3 yr^{-1}$ .

| No. | Component                      | 1961-1990 | 1971-2000 | 1981-2010 | 1991-2019 | 2001-2019 |
|-----|--------------------------------|-----------|-----------|-----------|-----------|-----------|
| 1   | Canopy                         | 0         | 0         | 0.1       | 0         | 0         |
| 2   | Snow                           | 11.4      | -9.2      | -2.5      | -13.7     | -0.8      |
| 3   | Soil                           | 4.9       | 7.5       | 9.4       | -0.2      | -8.7      |
| 4   | Groundwater                    | -66.7     | -73       | -99.6     | -118.1    | -142.7    |
| 5   | Local lakes                    | 0.1       | 1         | 0.8       | 0.3       | -1.3      |
| 6   | Local wetlands                 | 0.8       | -0.6      | 4.6       | 4.2       | 9.1       |
| 7   | Global lakes                   | -2        | -1        | -0.4      | 4.8       | 8.8       |
| 8   | Global wetlands                | -3.7      | 4.9       | 0.8       | 0.2       | -7        |
| 9   | Reservoirs and regulated lakes | 72.2      | 50.8      | 30.8      | 11        | 5.1       |
| 10  | River                          | 0.4       | 5.4       | -8.2      | 3.4       | 3.5       |
| 11  | Total water storage            | 17.4      | -14.2     | -64.2     | -108.2    | -134.1    |

**Table S7.** Globally aggregated (excluding Antarctica and Greenland) water storage component changes during different time periods as simulated by WaterGAP 2.2e with 20crv3-era5. All units in  $km^3 yr^{-1}$ .

| No. | Component                      | 1961-1990 | 1971-2000 | 1981-2010 | 1991-2019 | 2001-2021 |
|-----|--------------------------------|-----------|-----------|-----------|-----------|-----------|
| 1   | Canopy                         | 0         | 0         | 0         | 0         | 0         |
| 2   | Snow                           | 16.4      | 3.1       | -4.4      | -21.5     | -16.7     |
| 3   | Soil                           | 6.7       | 4.7       | -1.6      | -8.8      | -3.3      |
| 4   | Groundwater                    | -62.6     | -70.7     | -107.2    | -126.7    | -149.9    |
| 5   | Local lakes                    | -0.1      | 1.7       | 2.3       | 1.8       | 1.3       |
| 6   | Local wetlands                 | -1.0      | 4.9       | 1.5       | 8.5       | 3.7       |
| 7   | Global lakes                   | -3.7      | -1.6      | -4.6      | -0.2      | -2.4      |
| 8   | Global wetlands                | -0.9      | 4.1       | -6.0      | -7.0      | -11.6     |
| 9   | Reservoirs and regulated lakes | 71.7      | 49.9      | 27.9      | 16.5      | 24.3      |
| 10  | River                          | 1.9       | -7.8      | -12.5     | -0.2      | -7.3      |
| 11  | Total water storage            | 28.3      | -11.6     | -104.5    | -137.6    | -162.0    |

**Table S8.** Globally aggregated (excluding Antarctica and Greenland) water storage component changes during different time periods as simulated by WaterGAP 2.2e with 20crv3-w5e5. All units in  $km^3 yr^{-1}$ .

| No. | Component                      | 1961-1990 | 1971-2000 | 1981-2010 | 1991-2019 | 2001-2019 |
|-----|--------------------------------|-----------|-----------|-----------|-----------|-----------|
| 1   | Canopy                         | 0         | 0         | 0.1       | 0         | 0         |
| 2   | Snow                           | 11.1      | -4.1      | -0.9      | -13.3     | -0.8      |
| 3   | Soil                           | 4.2       | 7.7       | 9.5       | 0.2       | -7.9      |
| 4   | Groundwater                    | -71.2     | -71.3     | -96.3     | -117.9    | -145.2    |
| 5   | Local lakes                    | -1.1      | 0.9       | 0.8       | 0.2       | -1.3      |
| 6   | Local wetlands                 | 1.0       | 3.8       | 4.4       | 4.4       | 9.3       |
| 7   | Global lakes                   | -5.7      | -3.2      | -2.9      | 4.0       | 9.8       |
| 8   | Global wetlands                | -2.5      | 6.3       | 0.6       | 0.3       | -7.1      |
| 9   | Reservoirs and regulated lakes | 67.5      | 53.0      | 34.3      | 25.5      | 24.3      |
| 10  | River                          | -3.2      | -10.4     | -8.3      | 3.8       | 4.2       |
| 11  | Total water storage            | 0.1       | -17.5     | -58.6     | -92.7     | -114.8    |

**Table S9.** Globally aggregated (excluding Antarctica and Greenland) water storage component changes during different time periods as simulated by WaterGAP 2.2e with gswp3-era5. All units in  $km^3 yr^{-1}$ .

| No. | Component                      | 1961-1990 | 1971-2000 | 1981-2010 | 1991-2019 | 2001-2022 |
|-----|--------------------------------|-----------|-----------|-----------|-----------|-----------|
| 1   | Canopy                         | 0         | 0         | 0         | 0         | 0         |
| 2   | Snow                           | 20.3      | -1.1      | -6.3      | -20.2     | -14.1     |
| 3   | Soil                           | 6.2       | 3.6       | -1.7      | -8.8      | -12.5     |
| 4   | Groundwater                    | -62.4     | -73.8     | -107.0    | -125.8    | -150.3    |
| 5   | Local lakes                    | 1.3       | 2.0       | 2.4       | 1.8       | -1.0      |
| 6   | Local wetlands                 | -1.0      | 1.4       | 1.7       | 8.5       | 3.6       |
| 7   | Global lakes                   | -0.1      | -0.2      | -4.3      | -0.4      | -4.4      |
| 8   | Global wetlands                | -2.3      | 2.0       | -5.9      | -7.0      | -8.6      |
| 9   | Reservoirs and regulated lakes | 73.8      | 47.0      | 25.7      | 15.3      | 19.4      |
| 10  | River                          | 2.1       | 3.4       | -12.4     | -0.3      | -16.6     |
| 11  | Total water storage            | 38.0      | -15.7     | -107.7    | -136.8    | -184.7    |

**Table S10.** Globally aggregated (excluding Antarctica and Greenland) sectoral potential withdrawal water use WU and consumptive water use CU ( $km^3 yr^{-1}$ ) as well as use fractions from groundwater (%) as simulated by GWSWUSE of WaterGAP 2.2d with gswp3-w5e5 for the time period 1991-2019. These values represent demand for water that cannot be completely satisfied in WGHM due to lack of surface water resources (row 5 in Table S2)

| Water use sector     | WU   | Percent of WU from groundwater | CU   | Percent of CU from groundwater |
|----------------------|------|--------------------------------|------|--------------------------------|
| Irrigation           | 2541 | 25                             | 1179 | 37                             |
| Thermal power plants | 601  | 0                              | 16   | 0                              |
| Domestic             | 352  | 36                             | 57   | 37                             |
| Manufacturing        | 278  | 27                             | 56   | 26                             |
| Livestock            | 29   | 0                              | 29   | 0                              |
| Total                | 3801 | 22                             | 1336 | 36                             |

**Table S11.** Globally aggregated (excluding Antarctica and Greenland) sectoral potential withdrawal water use WU and consumptive water use CU ( $km^3 yr^{-1}$ ) as well as use fractions from groundwater (%) as simulated by GWSWUSE of WaterGAP 2.2e with 20crv3-era5 for the time period 1991-2019. These values represent demand for water that cannot be completely satisfied in WGHM due to lack of surface water resources (row 5 in Table S3)

| Water use sector     | WU   | Percent of WU from groundwater | CU   | Percent of CU from groundwater |
|----------------------|------|--------------------------------|------|--------------------------------|
| Irrigation           | 2378 | 25                             | 1106 | 37                             |
| Thermal power plants | 592  | 0                              | 18   | 0                              |
| Domestic             | 352  | 35                             | 57   | 36                             |
| Manufacturing        | 298  | 27                             | 60   | 25                             |
| Livestock            | 29   | 0                              | 29   | 0                              |
| Total                | 3650 | 22                             | 1269 | 35                             |

**Table S12.** Globally aggregated (excluding Antarctica and Greenland) sectoral potential withdrawal water use WU and consumptive water use CU ( $km^3 yr^{-1}$ ) as well as use fractions from groundwater (%) as simulated by GWSWUSE of WaterGAP 2.2e with 20crv3-w5e5 for the time period 1991-2019. These values represent demand for water that cannot be completely satisfied in WGHM due to lack of surface water resources (row 5 in Table S4)

| Water use sector     | WU   | Percent of WU from groundwater | CU   | Percent of CU from groundwater |
|----------------------|------|--------------------------------|------|--------------------------------|
| Irrigation           | 2541 | 25                             | 1179 | 37                             |
| Thermal power plants | 592  | 0                              | 18   | 0                              |
| Domestic             | 352  | 35                             | 57   | 36                             |
| Manufacturing        | 298  | 27                             | 60   | 25                             |
| Livestock            | 29   | 0                              | 29   | 0                              |
| Total                | 3813 | 22                             | 1342 | 35                             |

**Table S13.** Globally aggregated (excluding Antarctica and Greenland) sectoral potential withdrawal water use WU and consumptive water use CU ( $km^3 yr^{-1}$ ) as well as use fractions from groundwater (%) as simulated by GWSWUSE of WaterGAP 2.2e with gswp3-era5 for the time period 1991-2019. These values represent demand for water that cannot be completely satisfied in WGHM due to lack of surface water resources (row 5 in Table S5)

| Water use sector     | WU   | Percent of WU from groundwater | CU   | Percent of CU from groundwater |
|----------------------|------|--------------------------------|------|--------------------------------|
| Irrigation           | 2376 | 25                             | 1105 | 37                             |
| Thermal power plants | 592  | 0                              | 18   | 0                              |
| Domestic             | 352  | 35                             | 57   | 36                             |
| Manufacturing        | 298  | 27                             | 60   | 25                             |
| Livestock            | 29   | 0                              | 29   | 0                              |
| Total                | 3648 | 22                             | 1268 | 35                             |

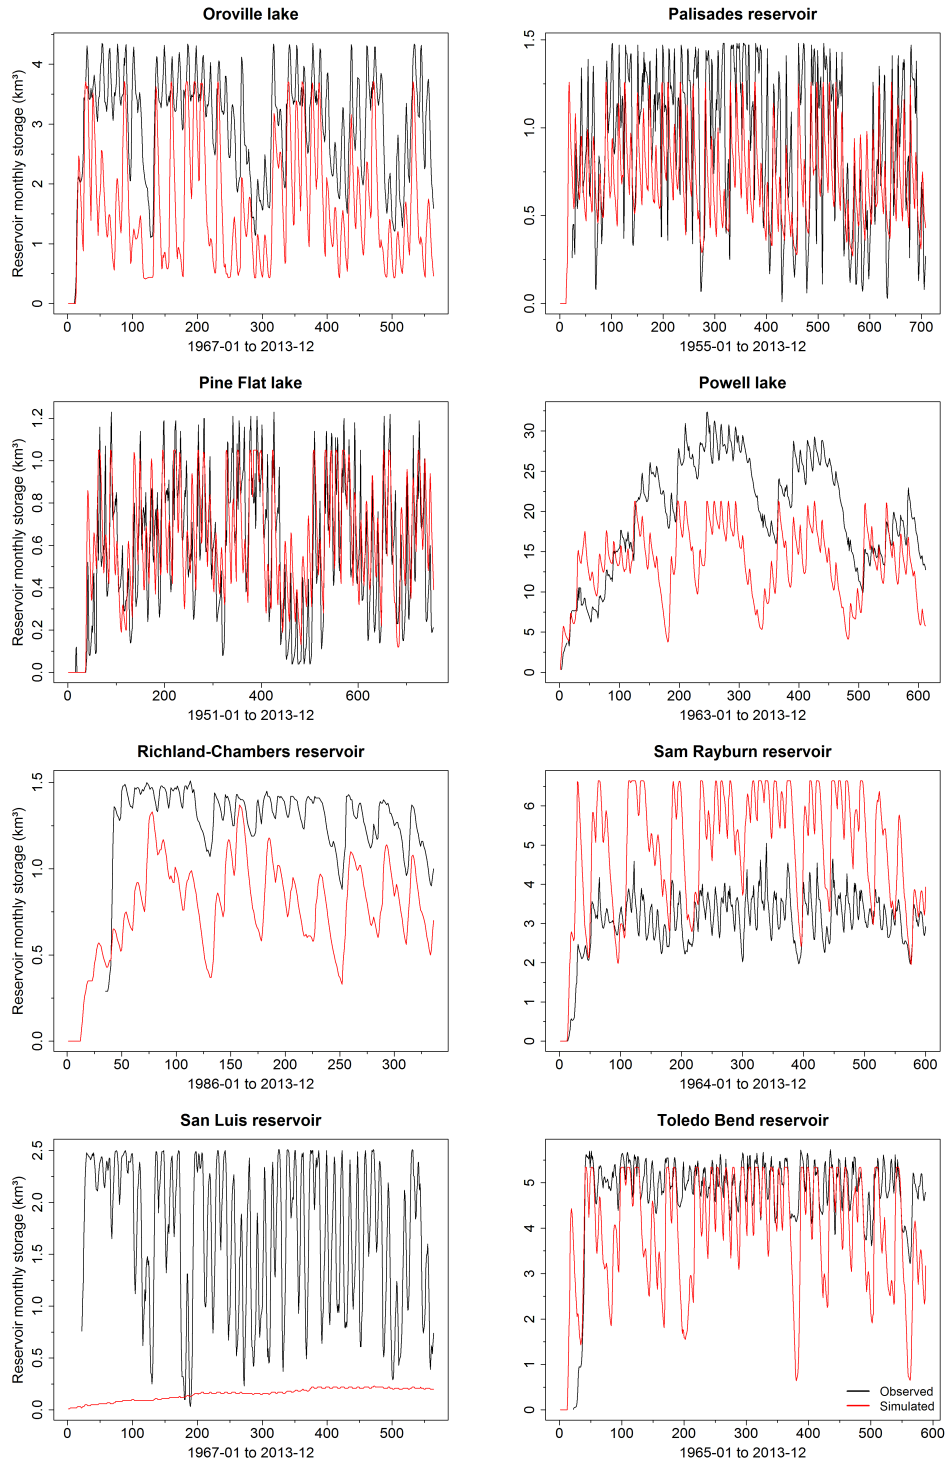

Figure S1. Comparison of simulated (with WaterGAP 2.2e) and observed water storage variations in reservoirs (Part 1)

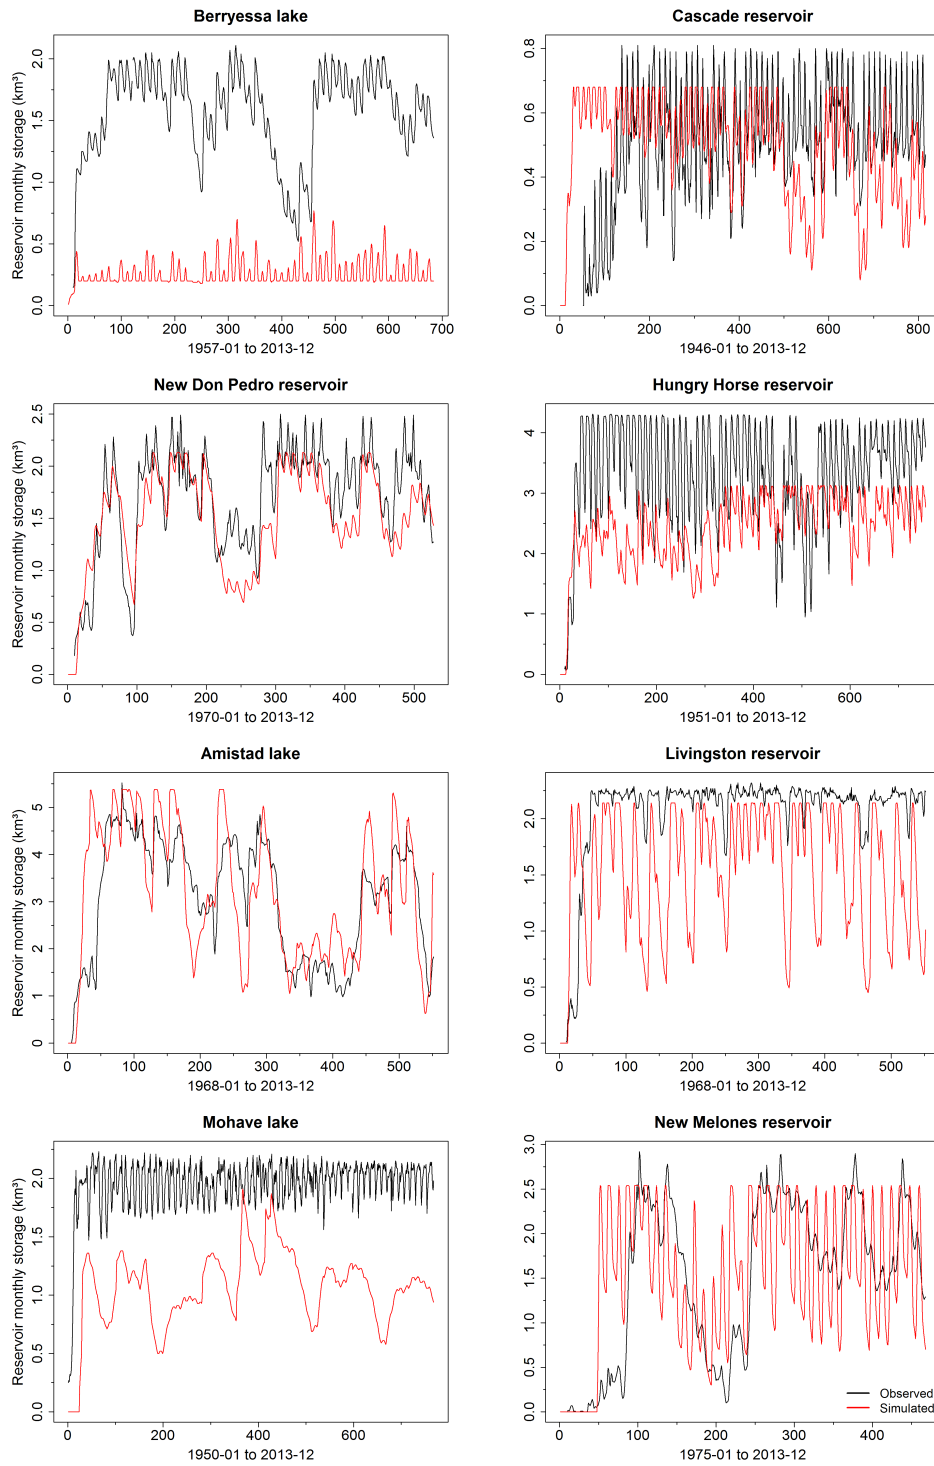

Figure S2. Comparison of simulated (with WaterGAP 2.2e) and observed water storage variations in reservoirs (Part 2)

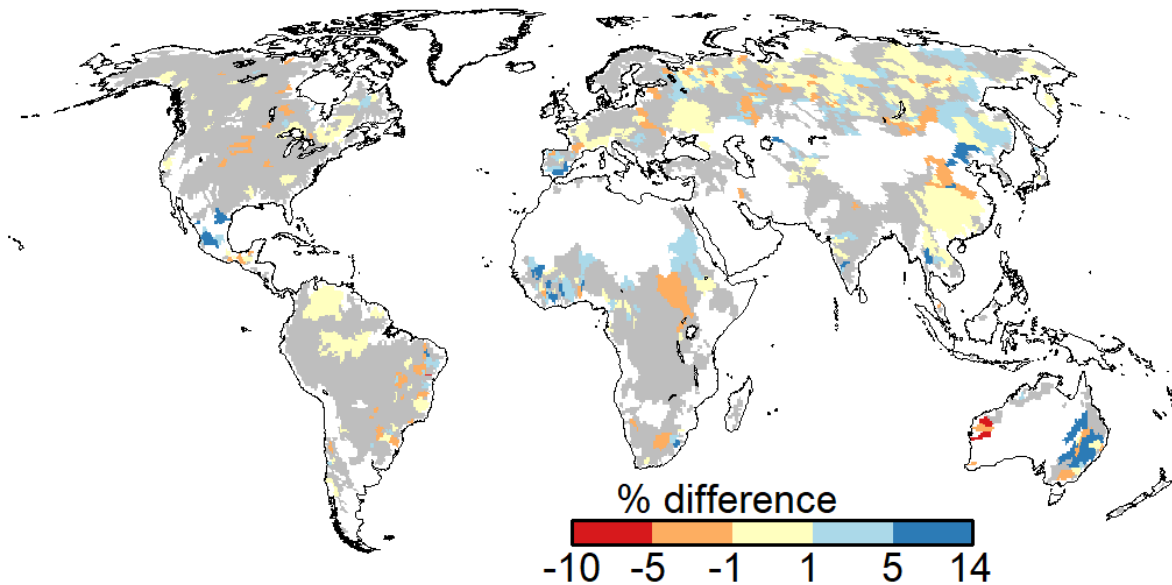

**Figure S3.** Per cent difference of mean monthly observed streamflow that resulted from neglecting one or two years for calibration as compared to full 30 years of calibration. Bluish colours mean that by using 30 years instead of less years, more streamflow would be taken into account for calibration (and vice versa for reddish colours). The issue is not affecting the grey areas.

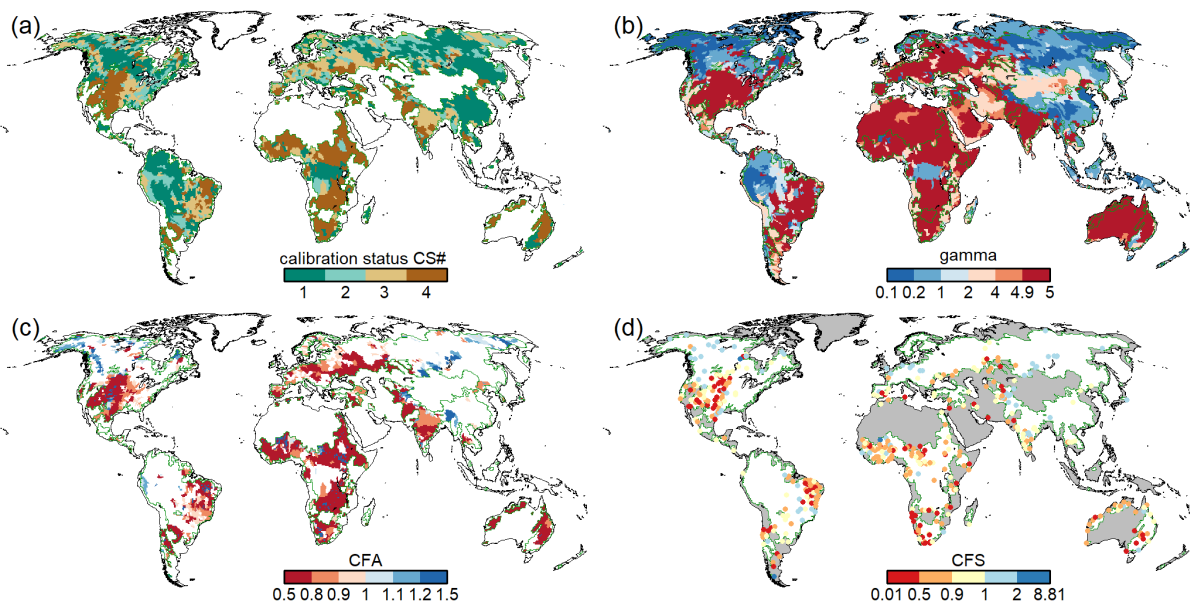

**Figure S4.** Results of the calibration of WaterGAP 2.2d to the gswp3-w5e5 climate forcing with (a) the calibration status of each calibration basin, (b) calibration parameter  $\gamma$ , (c) areal correction factor CFA and (d) station correction factor CFS. Grey areas in (d) indicate regions with regionalized calibration parameter  $\gamma$  and for (a)-(d) dark green outlines indicate the boundaries of the calibration basins. For details to the calibration procedure the reader is referred to Müller Schmied et al. (2021)



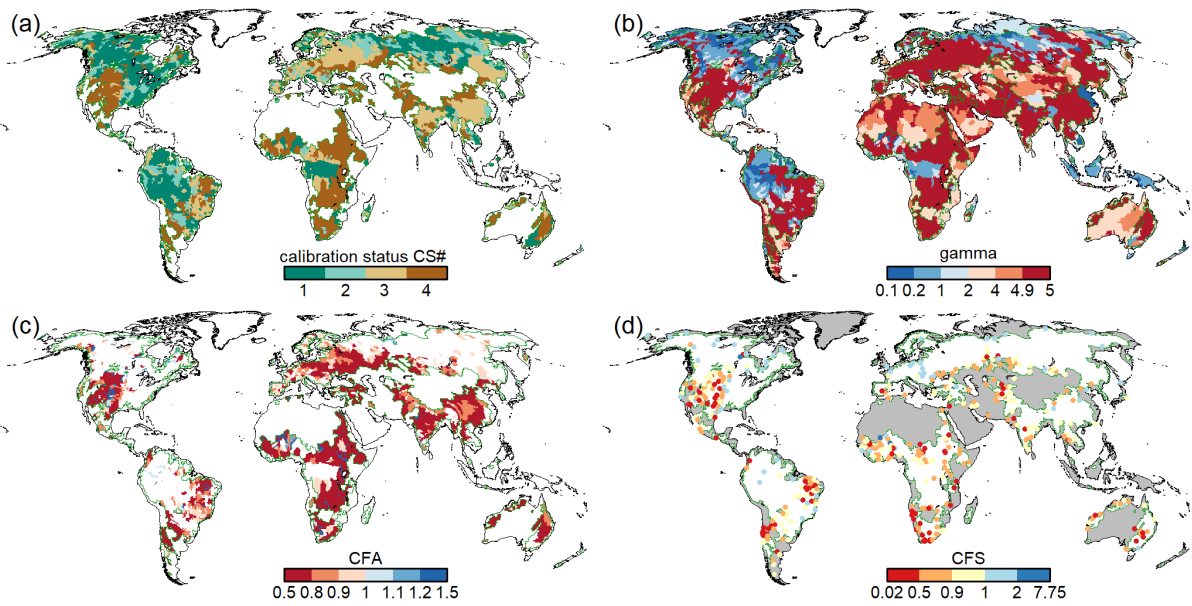

**Figure S5.** Results of the calibration of WaterGAP 2.2e to the gswp3-era5 climate forcing with (a) the calibration status of each calibration basin, (b) calibration parameter  $\gamma$ , (c) areal correction factor CFA and (d) station correction factor CFS. Grey areas in (d) indicate regions with regionalized calibration parameter  $\gamma$  and for (a)-(d) dark green outlines indicate the boundaries of the calibration basins. For details to the calibration procedure the reader is referred to Müller Schmied et al. (2021)

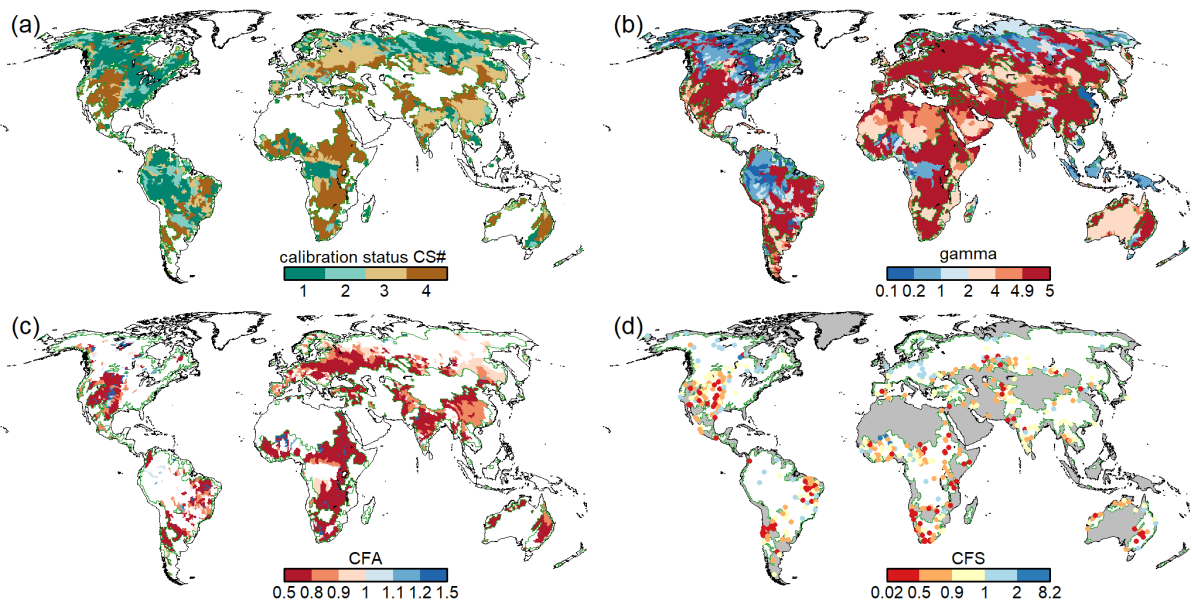

**Figure S6.** Results of the calibration of WaterGAP 2.2e to the 20crv3-era5 climate forcing with (a) the calibration status of each calibration basin, (b) calibration parameter  $\gamma$ , (c) areal correction factor CFA and (d) station correction factor CFS. Grey areas in (d) indicate regions with regionalized calibration parameter  $\gamma$  and for (a)-(d) dark green outlines indicate the boundaries of the calibration basins. For details to the calibration procedure the reader is referred to Müller Schmied et al. (2021)

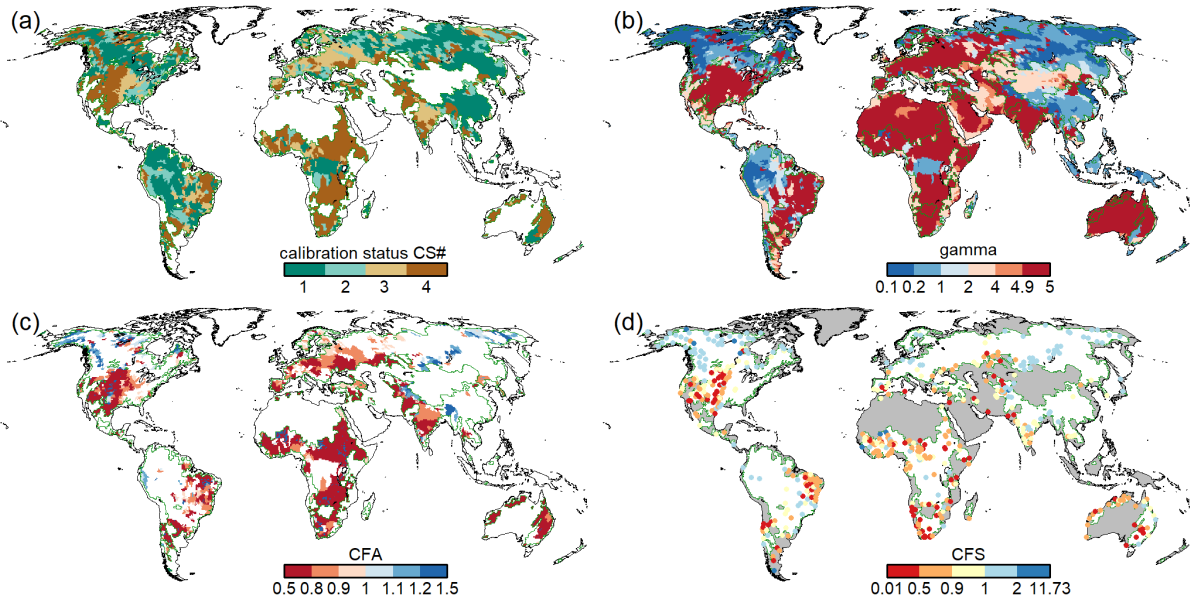

**Figure S7.** Results of the calibration of WaterGAP 2.2e to the 20crv3-w5e5 climate forcing with (a) the calibration status of each calibration basin, (b) calibration parameter  $\gamma$ , (c) areal correction factor CFA and (d) station correction factor CFS. Grey areas in (d) indicate regions with regionalized calibration parameter  $\gamma$  and for (a)-(d) dark green outlines indicate the boundaries of the calibration basins. For details to the calibration procedure the reader is referred to Müller Schmied et al. (2021)

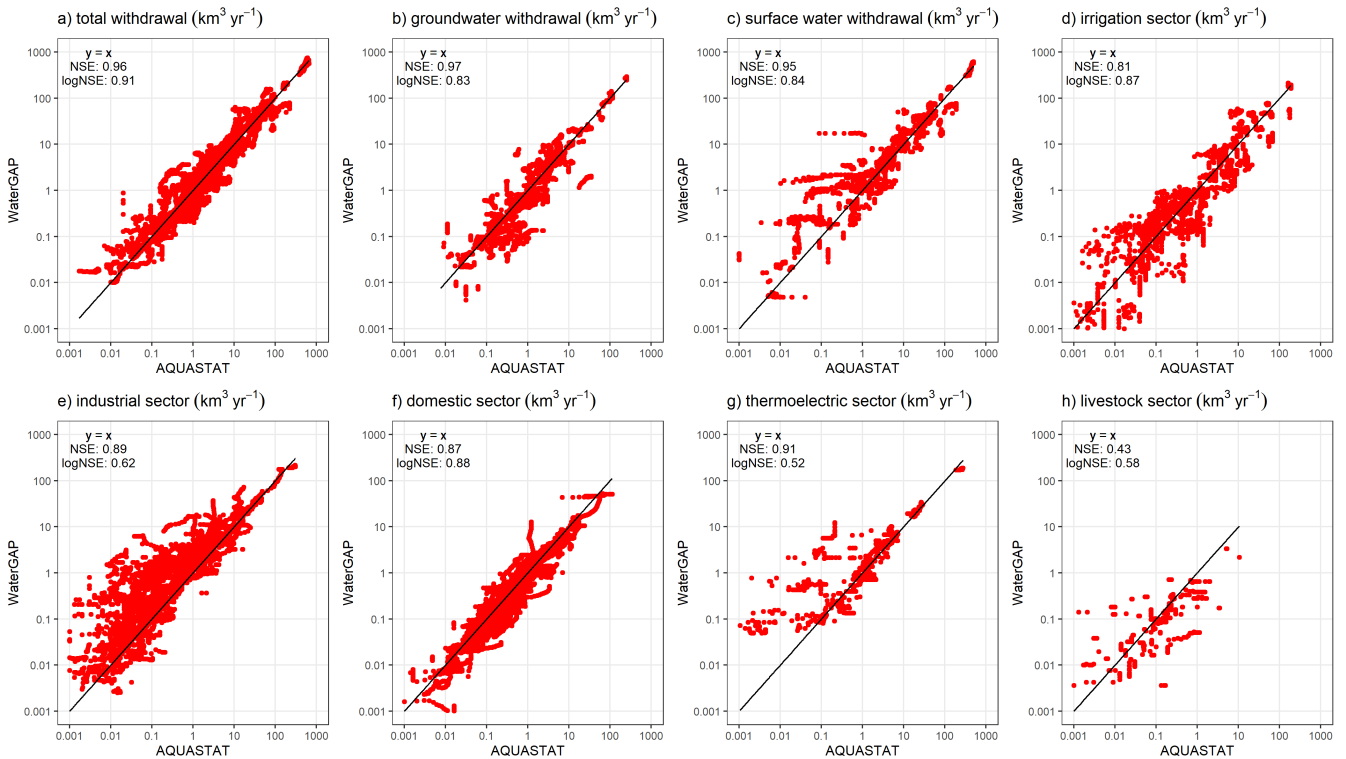

**Figure S8.** Comparison of potential withdrawal water uses from WaterGAP 2.2d and gswp3-w5e5 with AQUASTAT (FAO, 2023). Each data point represents one yearly value (if present in the database) per country for the time span 1964-2019.

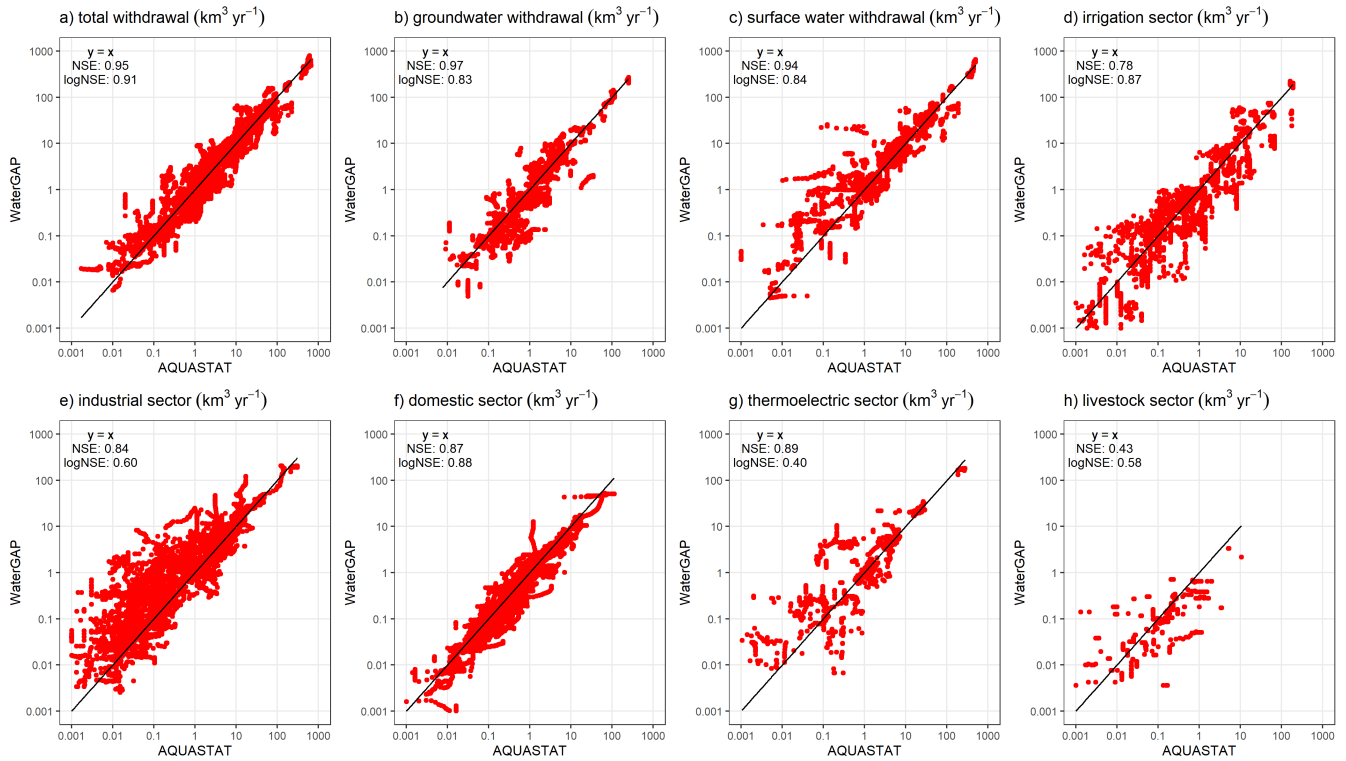

**Figure S9.** Comparison of potential withdrawal water uses from WaterGAP 2.2e and 20crv3-era5 with AQUASTAT (FAO, 2023). Each data point represents one yearly value (if present in the database) per country for the time span 1964-2019.

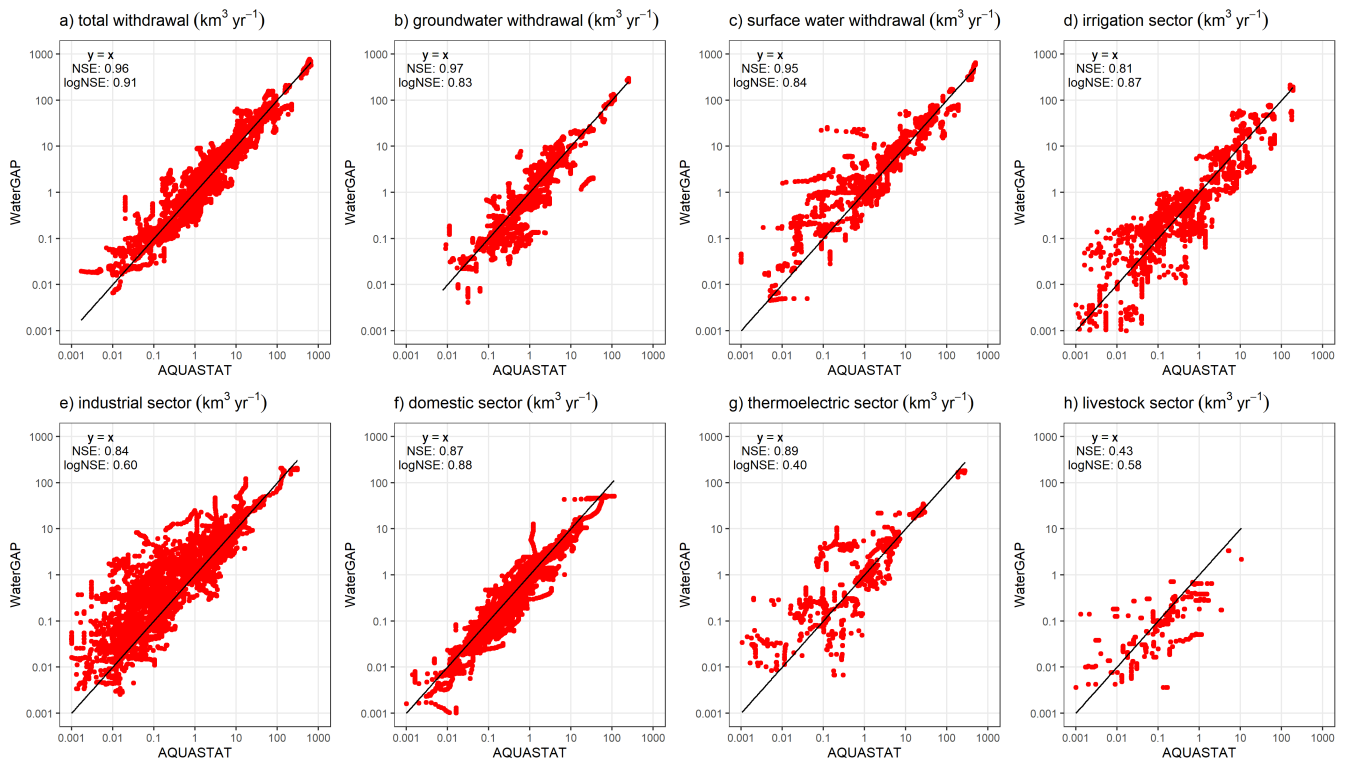

**Figure S10.** Comparison of potential withdrawal water uses from WaterGAP 2.2e and 20crv3-w5e5 with AQUASTAT (FAO, 2023). Each data point represents one yearly value (if present in the database) per country for the time span 1964-2019.

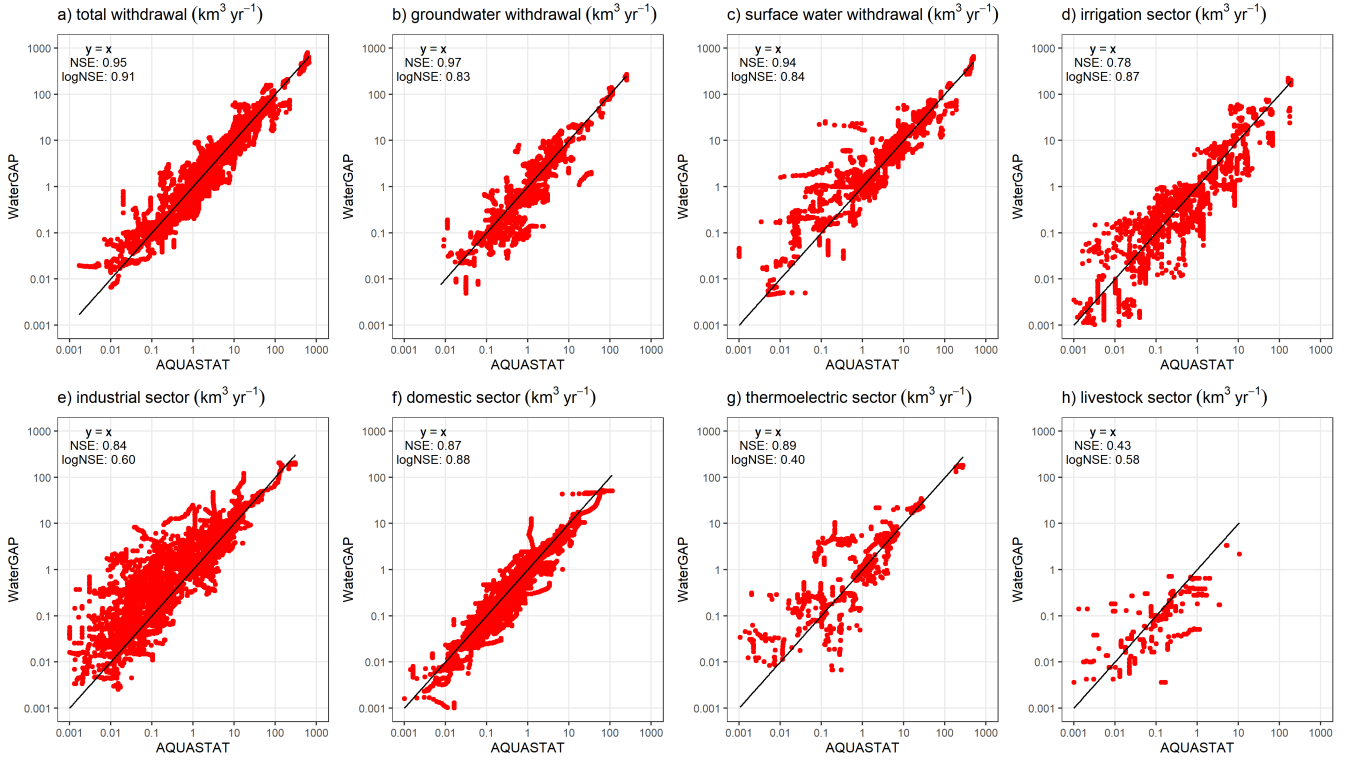

**Figure S11.** Comparison of potential withdrawal water uses from WaterGAP 2.2e and gswp3-era5 with AQUASTAT (FAO, 2023). Each data point represents one yearly value (if present in the database) per country for the time span 1964-2019.

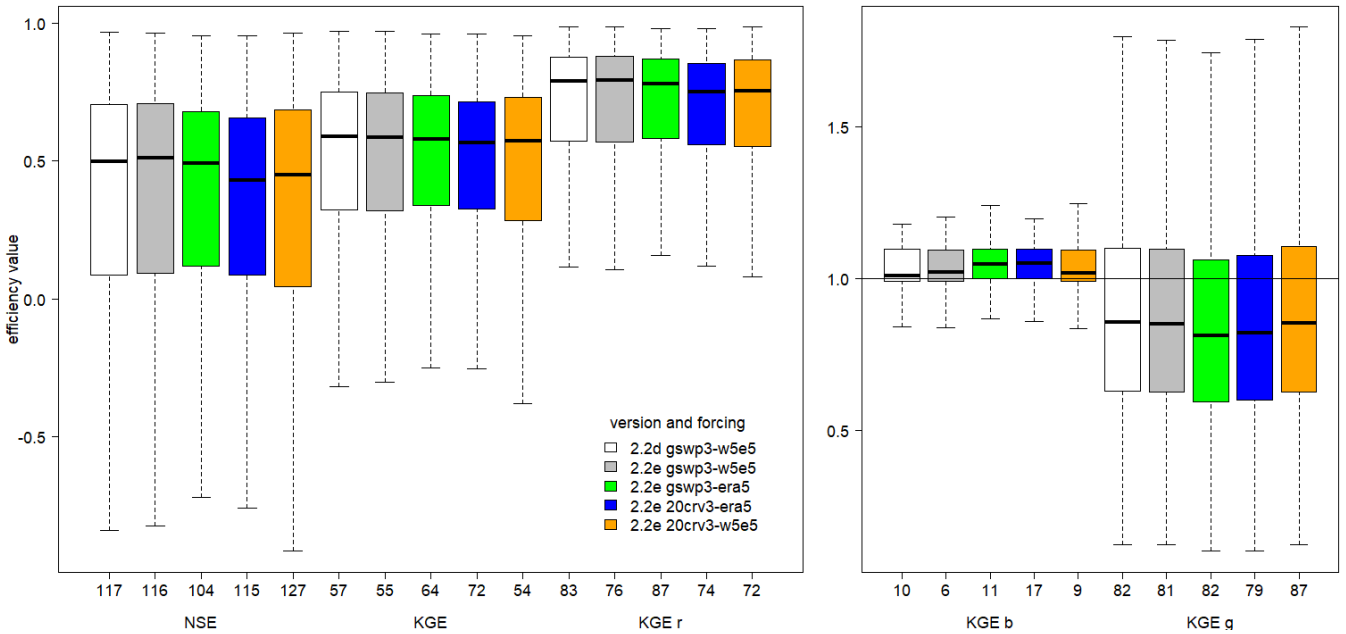

**Figure S12.** Efficiency metrics for monthly streamflow of the WaterGAP variants at the 1509 observation stations (calibration data) with NSE,  $KGE$  and its components. Outliers (outside 1.5x inter-quartile range) are excluded but the number of stations that are defined as outliers are indicated after the metric.

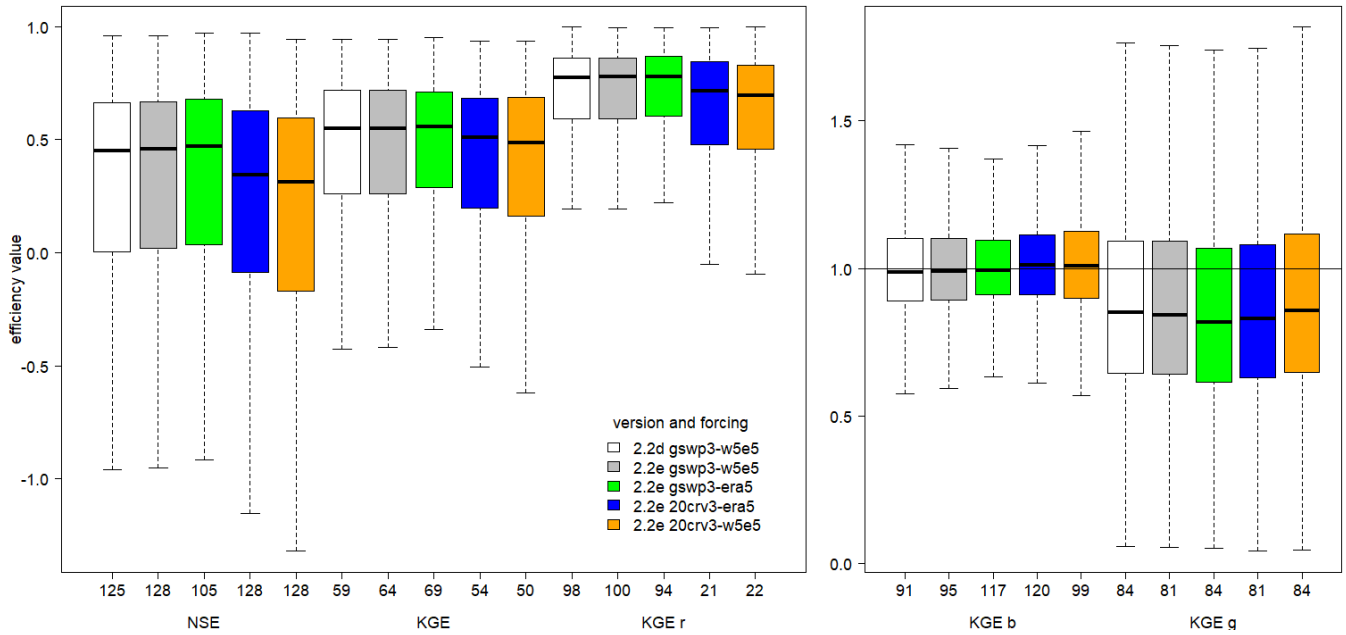

**Figure S13.** Efficiency metrics for monthly streamflow of the WaterGAP variants at the 1509 observation stations (validation data) with *NSE*, *KGE* and its components. Outliers (outside  $1.5\times$  inter-quartile range) are excluded but the number of stations that are defined as outliers are indicated after the metric.

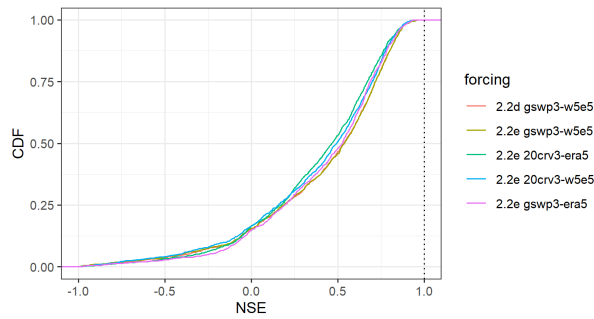

**Figure S14.** Cumulative distribution of the *NSE* efficiency metric for calibration streamflow values at the 1509 gauging stations for all model variants.

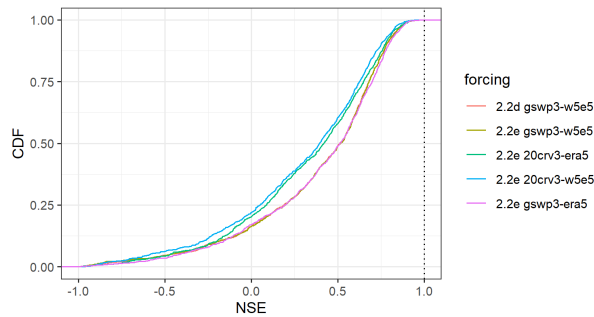

**Figure S15.** Cumulative distribution of the *NSE* efficiency metric for validation streamflow values at the 1509 gauging stations for all model variants.

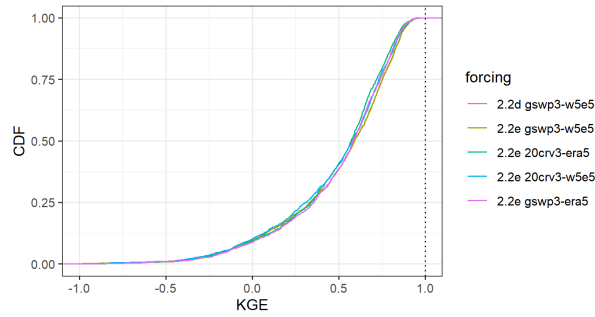

**Figure S16.** Cumulative distribution of the *KGE* efficiency metric for calibration streamflow values at the 1509 gauging stations for all model variants.

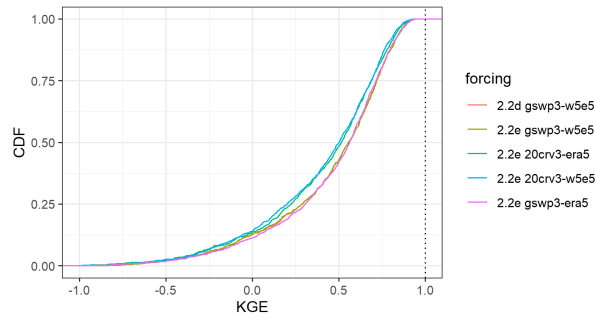

**Figure S17.** Cumulative distribution of the *KGE* efficiency metric for validation streamflow values at the 1509 gauging stations for all model variants.

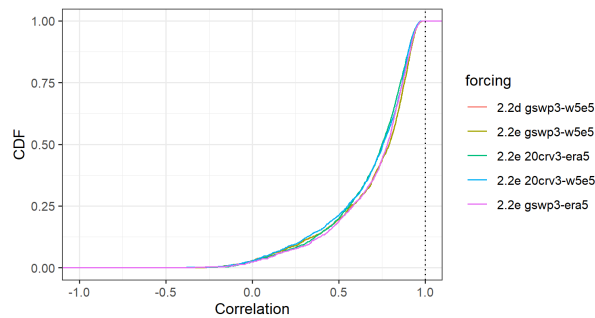

**Figure S18.** Cumulative distribution of the *KGE* efficiency metric (correlation parameter) for calibration streamflow values at the 1509 gauging stations for all model variants.

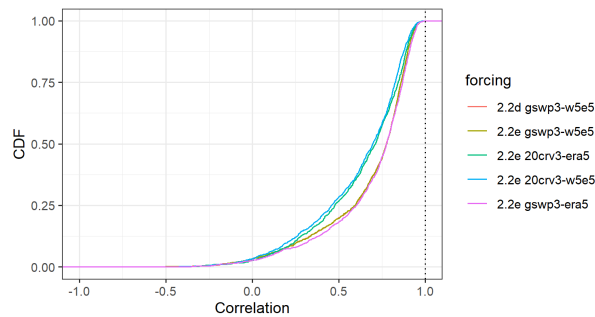

**Figure S19.** Cumulative distribution of the *KGE* efficiency metric (correlation parameter) for validation streamflow values at the 1509 gauging stations for all model variants.

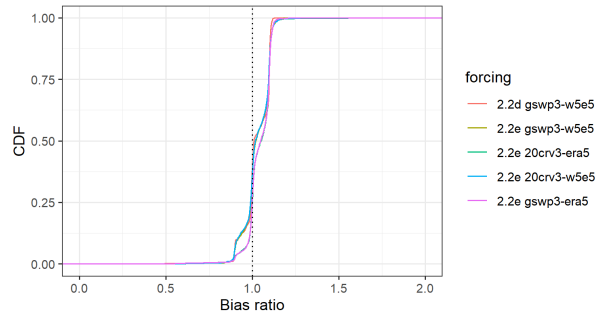

**Figure S20.** Cumulative distribution of the *KGE* efficiency metric (bias parameter) for calibration streamflow values at the 1509 gauging stations for all model variants.

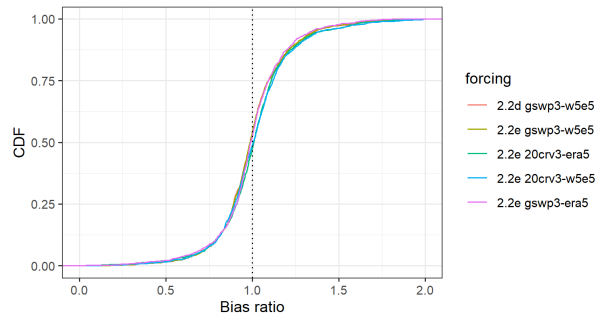

**Figure S21.** Cumulative distribution of the *KGE* efficiency metric (bias parameter) for validation streamflow values at the 1509 gauging stations for all model variants.

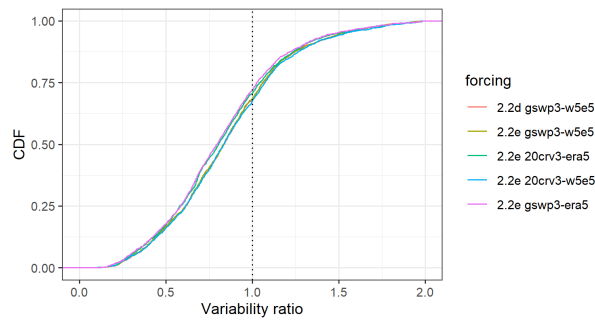

**Figure S22.** Cumulative distribution of the *KGE* efficiency metric (variability parameter) for calibration streamflow values at the 1509 gauging stations for all model variants.

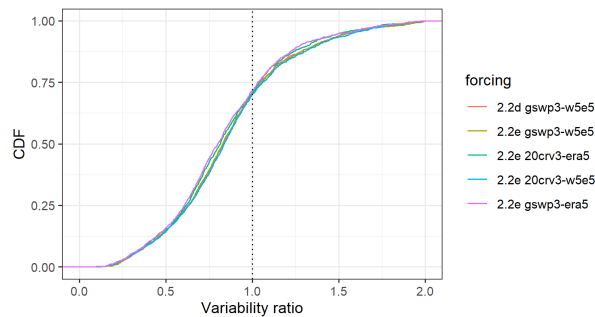

**Figure S23.** Cumulative distribution of the *KGE* efficiency metric (variability parameter) for validation streamflow values at the 1509 gauging stations for all model variants.

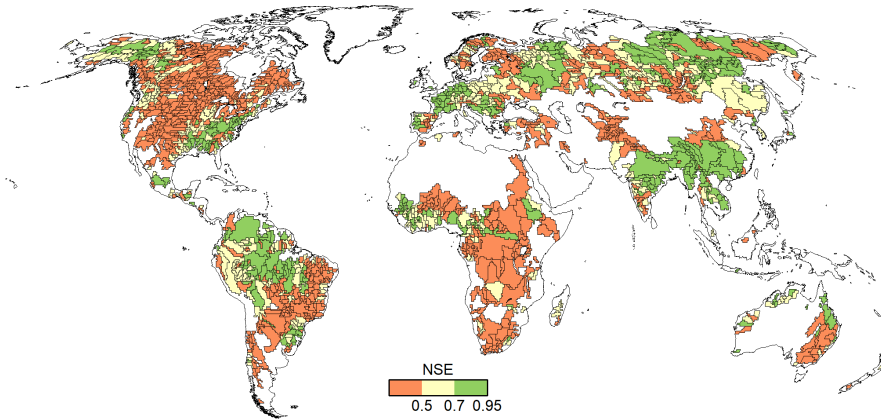

**Figure S24.** *NSE* efficiency metric for all monthly data of the 1509 river basins in WaterGAP 2.2d as forced by gswp3-w5e5.

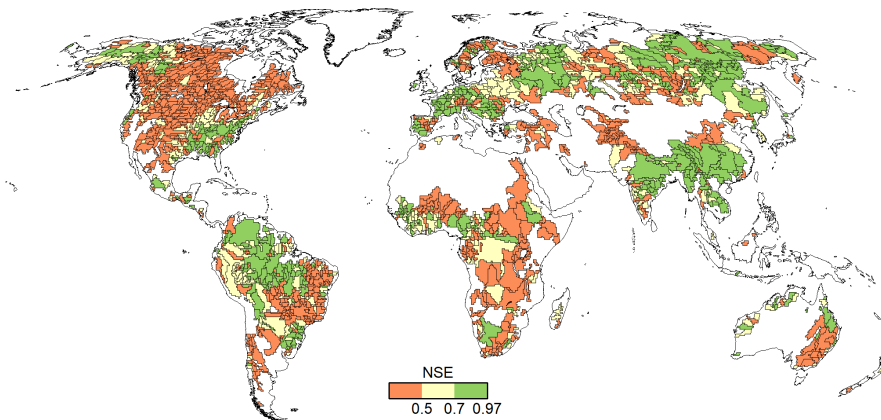

**Figure S25.** *NSE* efficiency metric for calibration data of the 1509 river basins in WaterGAP 2.2d as forced by gswp3-w5e5.

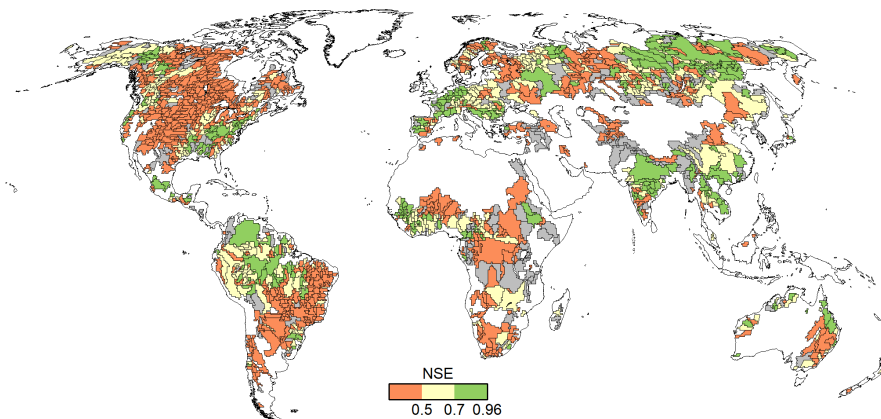

**Figure S26.** *NSE* efficiency metric for validation data of the 1509 river basins in WaterGAP 2.2d as forced by gswp3-w5e5. Grey colour indicate that no calculation is possible due to not available observation.



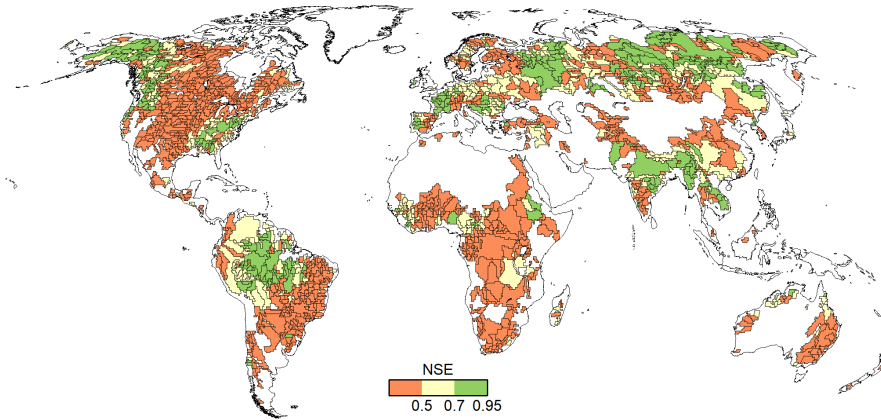

**Figure S27.** *NSE* efficiency metric for all monthly data of the 1509 river basins in WaterGAP 2.2e as forced by 20crv3-era5.

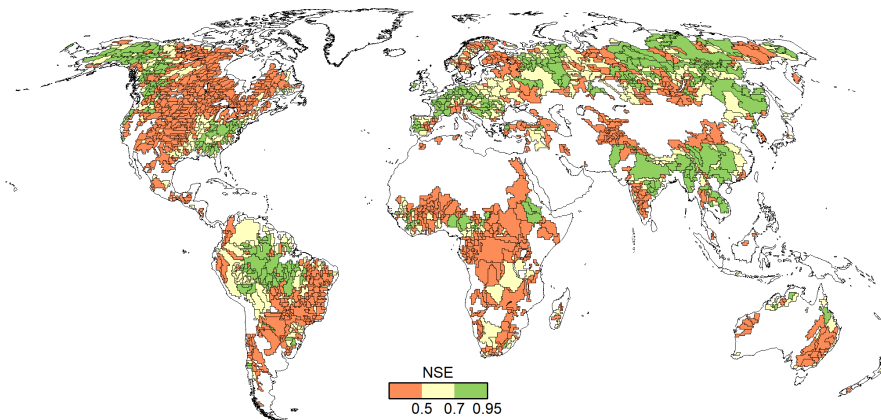

**Figure S28.** *NSE* efficiency metric for calibration data of the 1509 river basins in WaterGAP 2.2e as forced by 20crv3-era5.

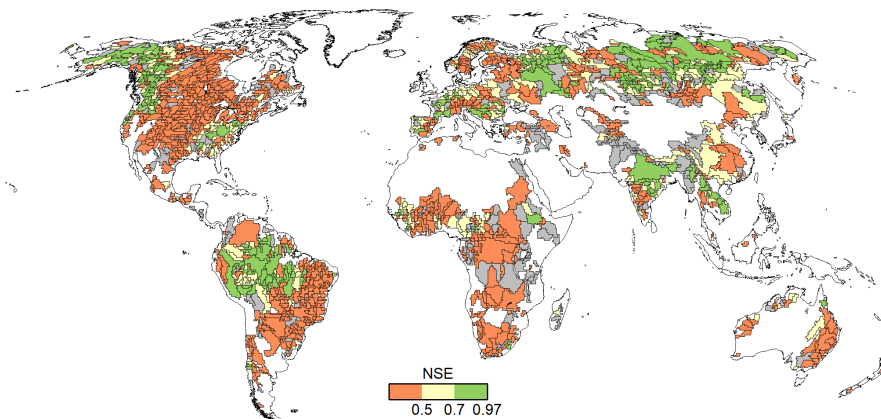

**Figure S29.** *NSE* efficiency metric for validation data of the 1509 river basins in WaterGAP 2.2e as forced by 20crv3-era5. Grey colour indicate that no calculation is possible due to not available observation.

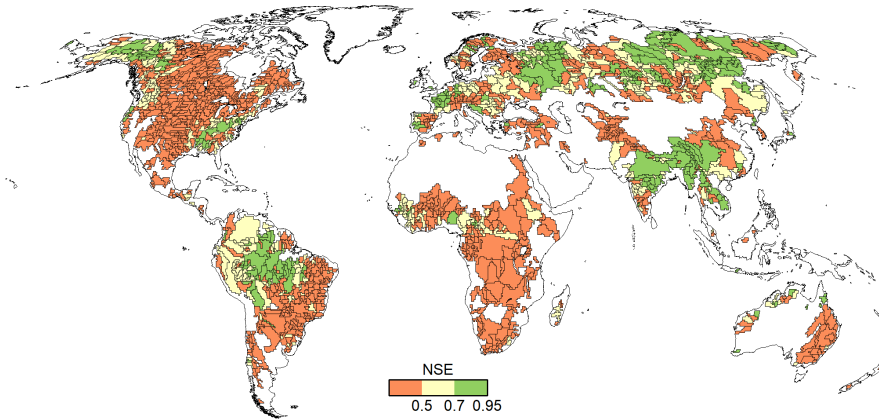

**Figure S30.** *NSE* efficiency metric for all monthly data of the 1509 river basins in WaterGAP 2.2e as forced by 20crv3-w5e5.

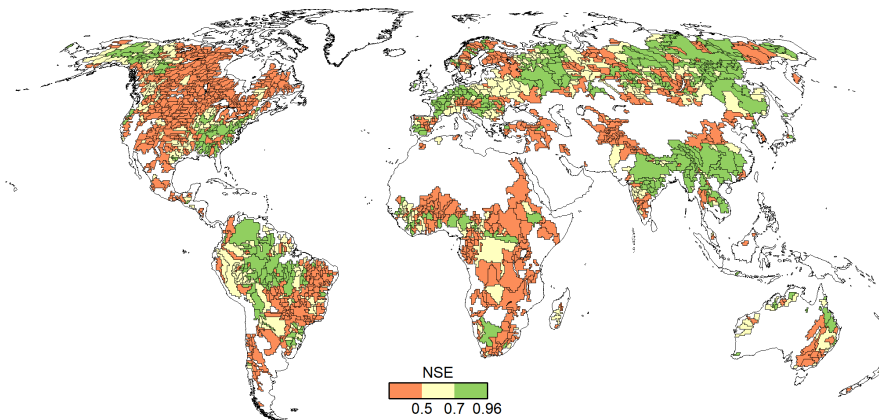

**Figure S31.** *NSE* efficiency metric for calibration data of the 1509 river basins in WaterGAP 2.2e as forced by 20crv3-w5e5.

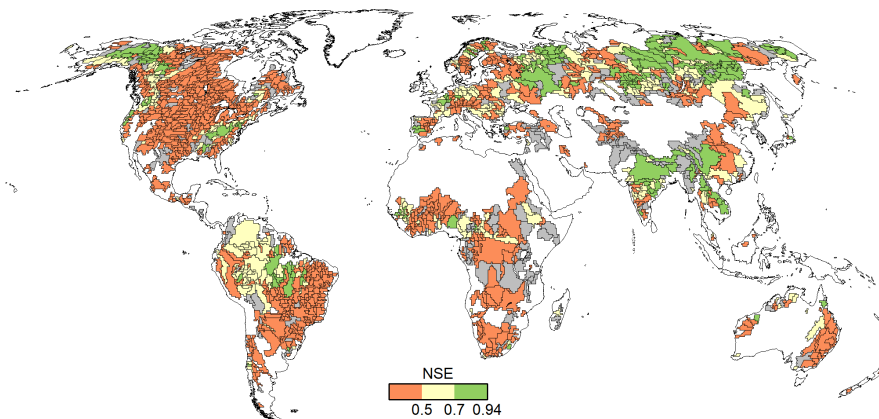

**Figure S32.** *NSE* efficiency metric for validation data of the 1509 river basins in WaterGAP 2.2e as forced by 20crv3-w5e5. Grey colour indicate that no calculation is possible due to not available observation.

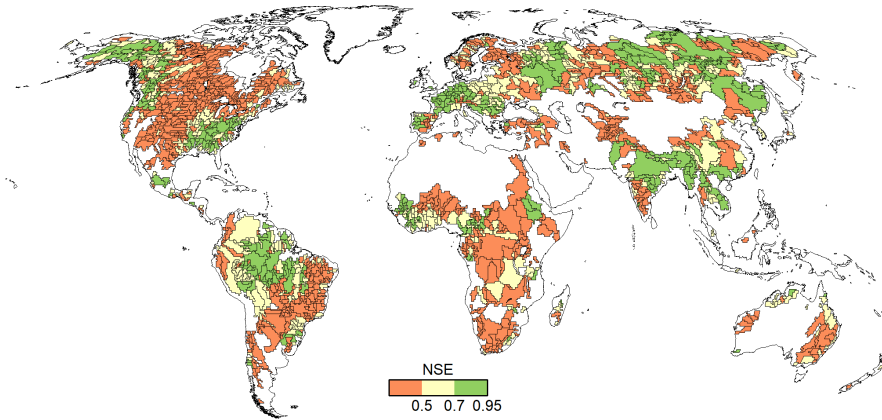

**Figure S33.** *NSE* efficiency metric for all monthly data of the 1509 river basins in WaterGAP 2.2e as forced by gswp3-era5.

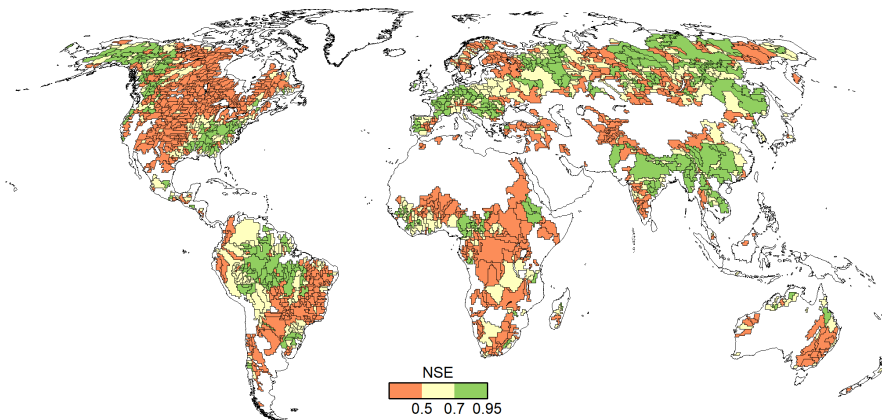

**Figure S34.** *NSE* efficiency metric for calibration data of the 1509 river basins in WaterGAP 2.2e as forced by gswp3-era5.

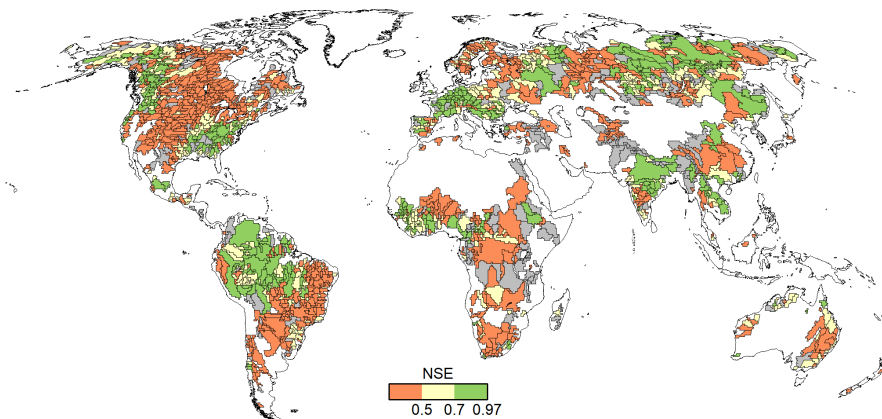

**Figure S35.** *NSE* efficiency metric for validation data of the 1509 river basins in WaterGAP 2.2e as forced by gswp3-era5. Grey colour indicate that no calculation is possible due to not available observation.

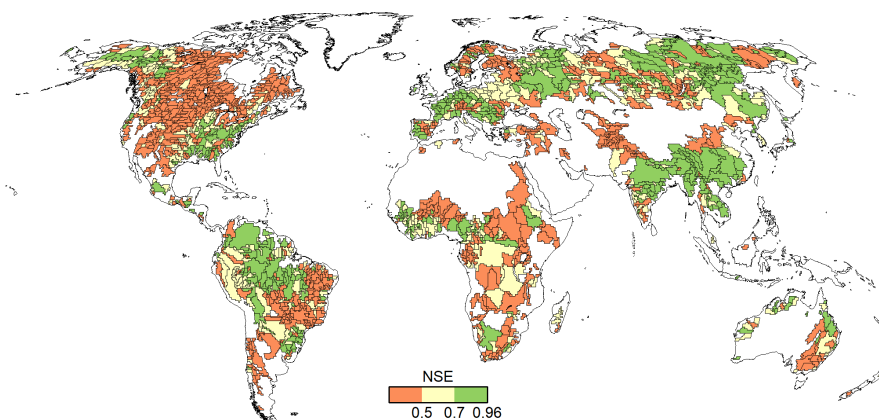

**Figure S36.** *NSE* efficiency metric for calibration data of the 1509 river basins in WaterGAP 2.2e as forced by gswp3-w5e5.

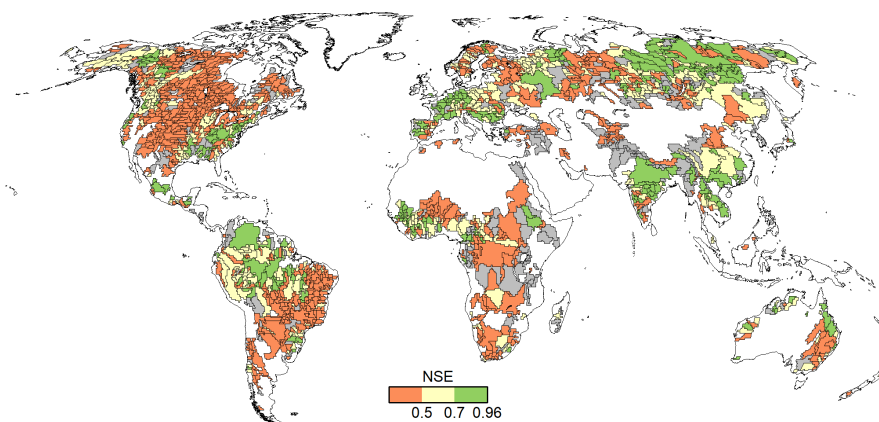

**Figure S37.** *NSE* efficiency metric for validation data of the 1509 river basins in WaterGAP 2.2e as forced by gswp3-w5e5. Grey colour indicate that no calculation is possible due to not available observation.

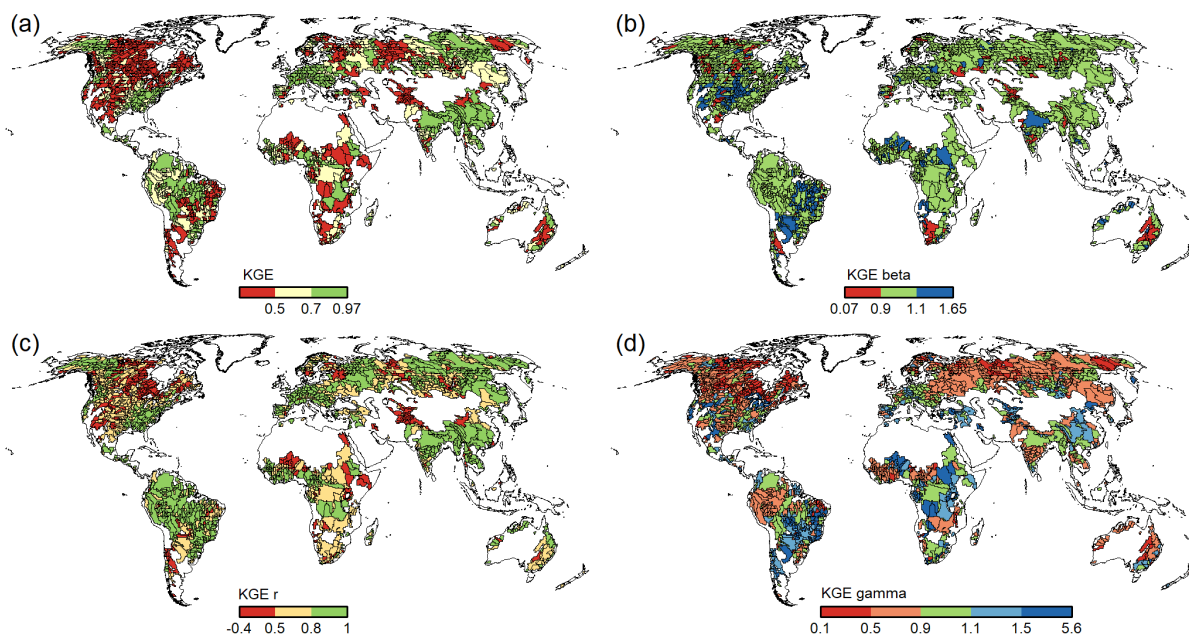

**Figure S38.** *KGE* efficiency metric and its components for all monthly streamflow values at the 1509 gauging stations for WaterGAP 2.2d as forced by gswp3-w5e5.

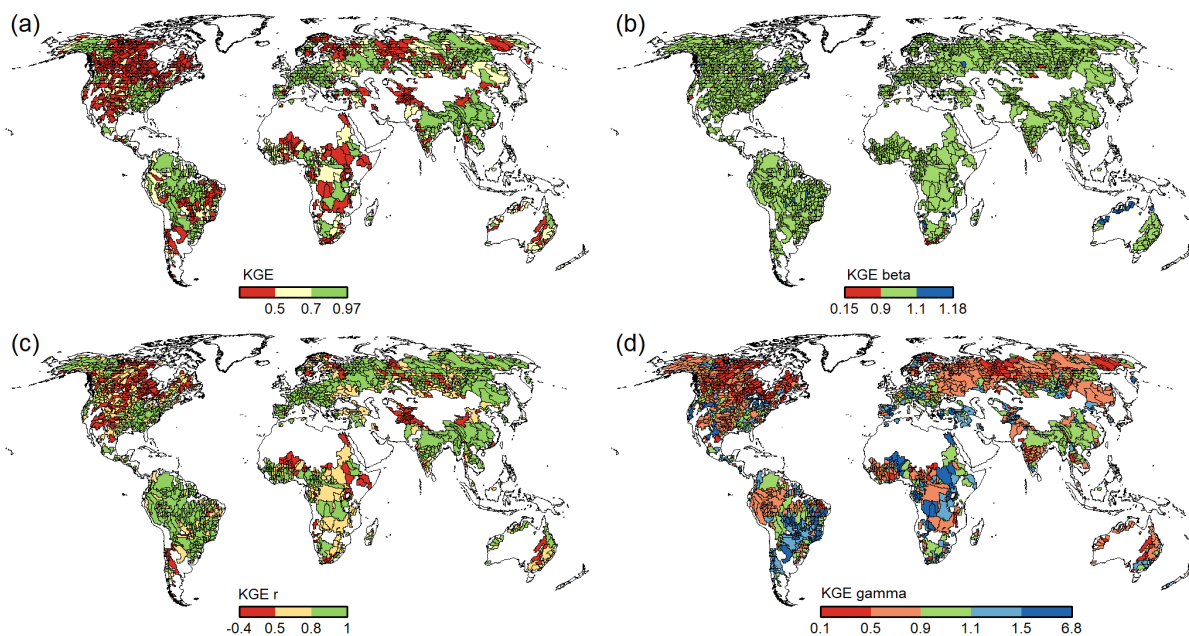

**Figure S39.** *KGE* efficiency metric and its components for calibration monthly streamflow values at the 1509 gauging stations for WaterGAP 2.2d as forced by gswp3-w5e5.

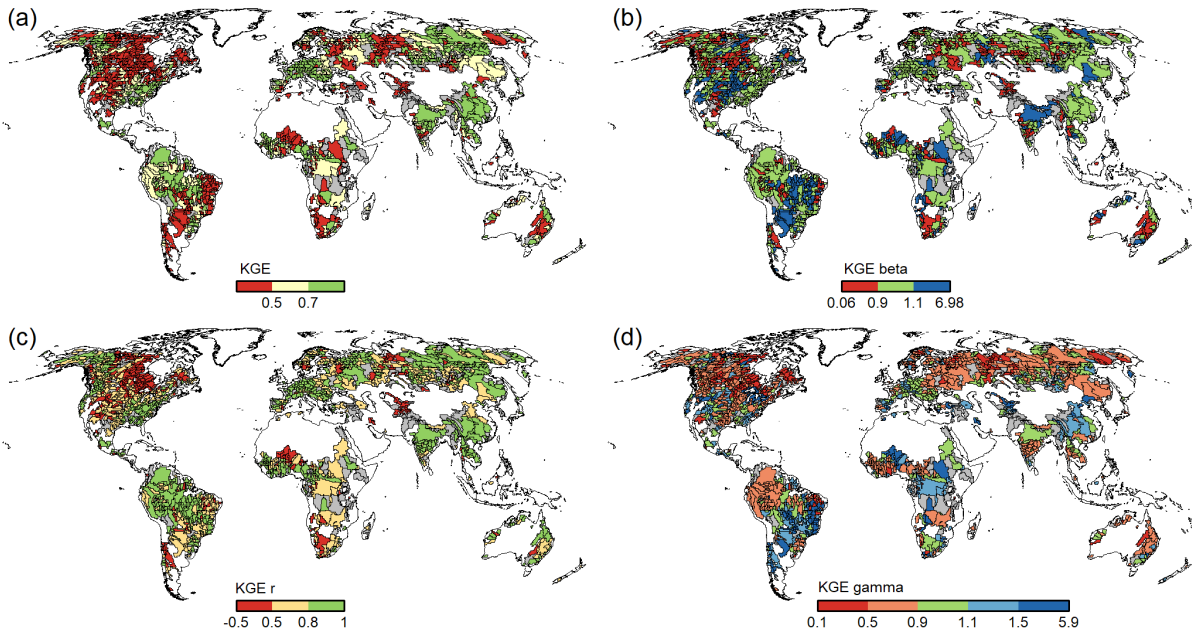

**Figure S40.** *KGE* efficiency metric and its components for validation monthly streamflow values at the 1509 gauging stations for WaterGAP 2.2d as forced by gswp3-w5e5. Grey colour indicate that no calculation is possible due to not available observation

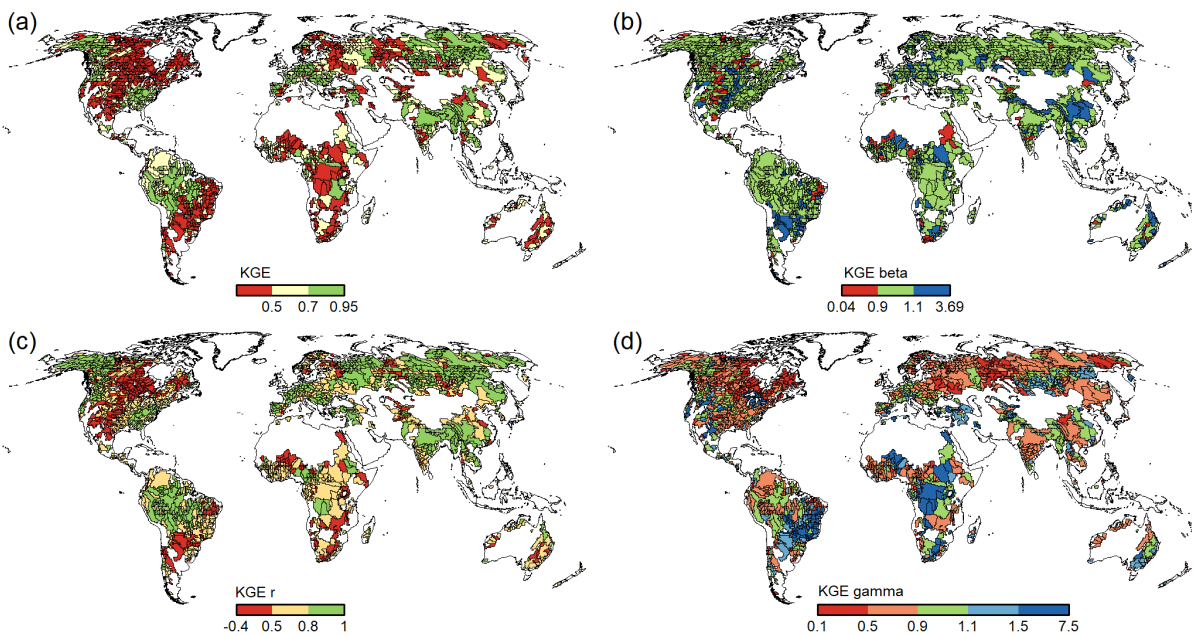

**Figure S41.** *KGE* efficiency metric and its components for all monthly streamflow values at the 1509 gauging stations for WaterGAP 2.2e as forced by 20crv3-era5.

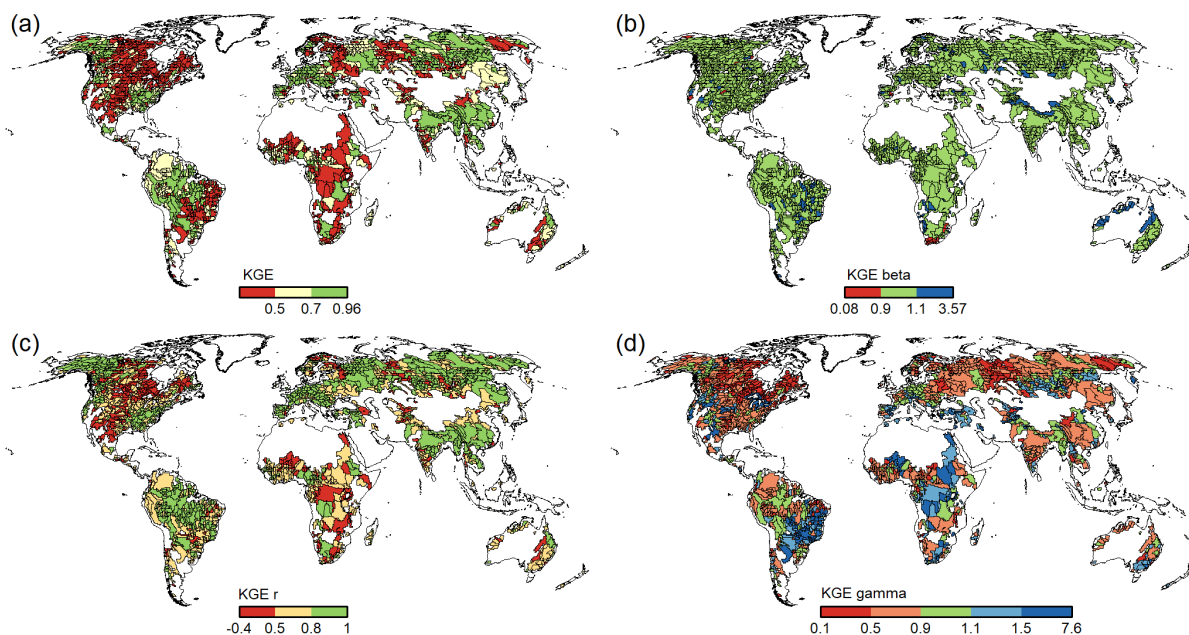

**Figure S42.** *KGE* efficiency metric and its components for calibration monthly streamflow values at the 1509 gauging stations for WaterGAP 2.2e as forced by 20crv3-era5.

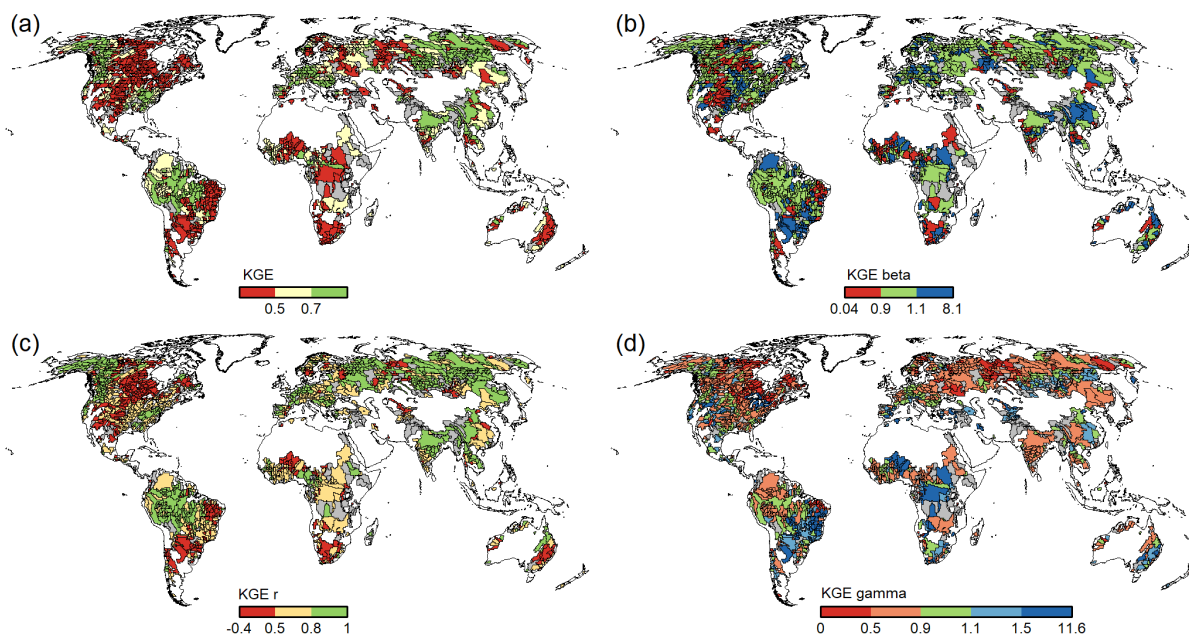

**Figure S43.** *KGE* efficiency metric and its components for validation monthly streamflow values at the 1509 gauging stations for WaterGAP 2.2e as forced by 20crv3-era5. Grey colour indicate that no calculation is possible due to not available observation

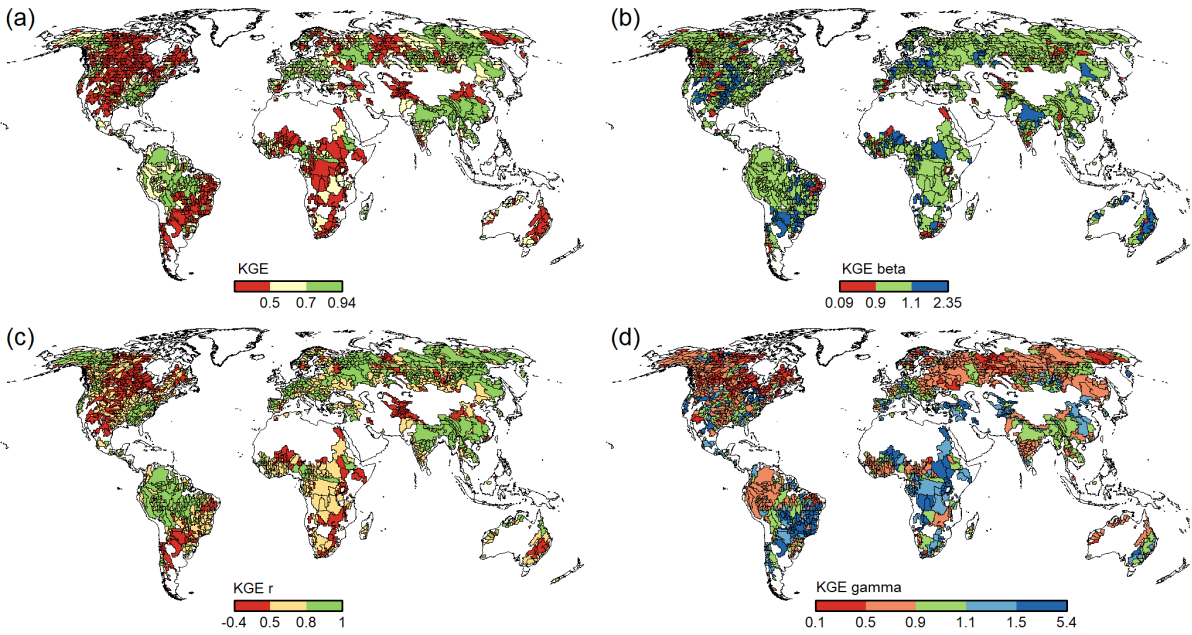

**Figure S44.** *KGE* efficiency metric and its components for all monthly streamflow values at the 1509 gauging stations for WaterGAP 2.2e as forced by 20crv3-w5e5.

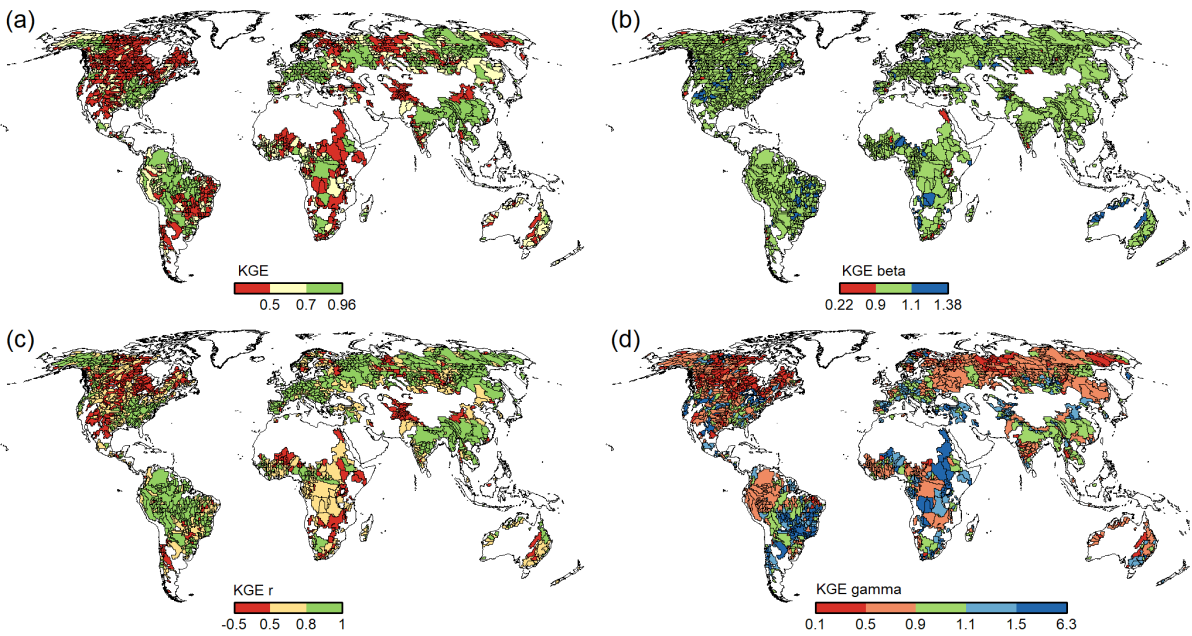

**Figure S45.** *KGE* efficiency metric and its components for calibration monthly streamflow values at the 1509 gauging stations for WaterGAP 2.2e as forced by 20crv3-w5e5.



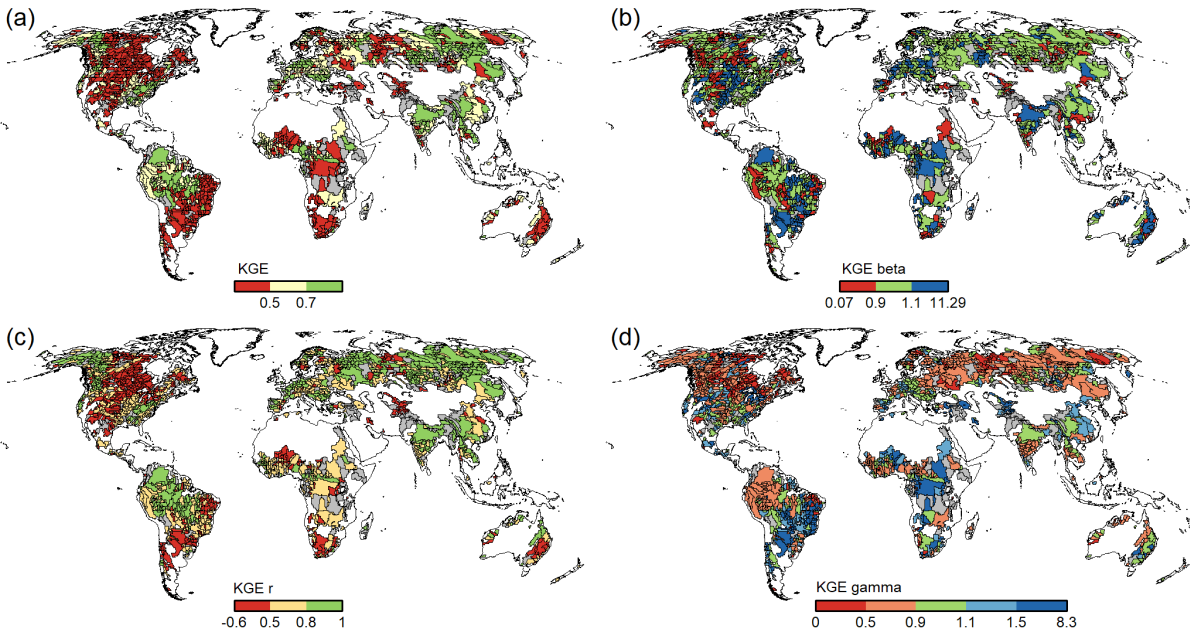

**Figure S46.** *KGE* efficiency metric and its components for validation monthly streamflow values at the 1509 gauging stations for WaterGAP 2.2e as forced by 20crv3-w5e5. Grey colour indicate that no calculation is possible due to not available observation

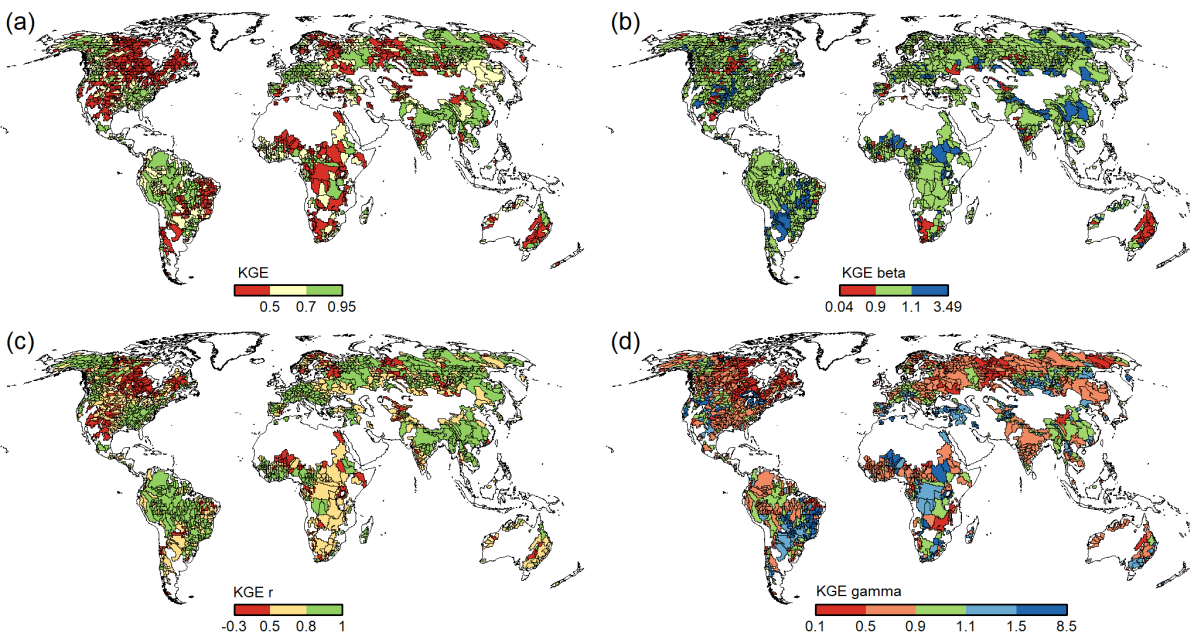

**Figure S47.** *KGE* efficiency metric and its components for all monthly streamflow values at the 1509 gauging stations for WaterGAP 2.2e as forced by gswp3-era5.

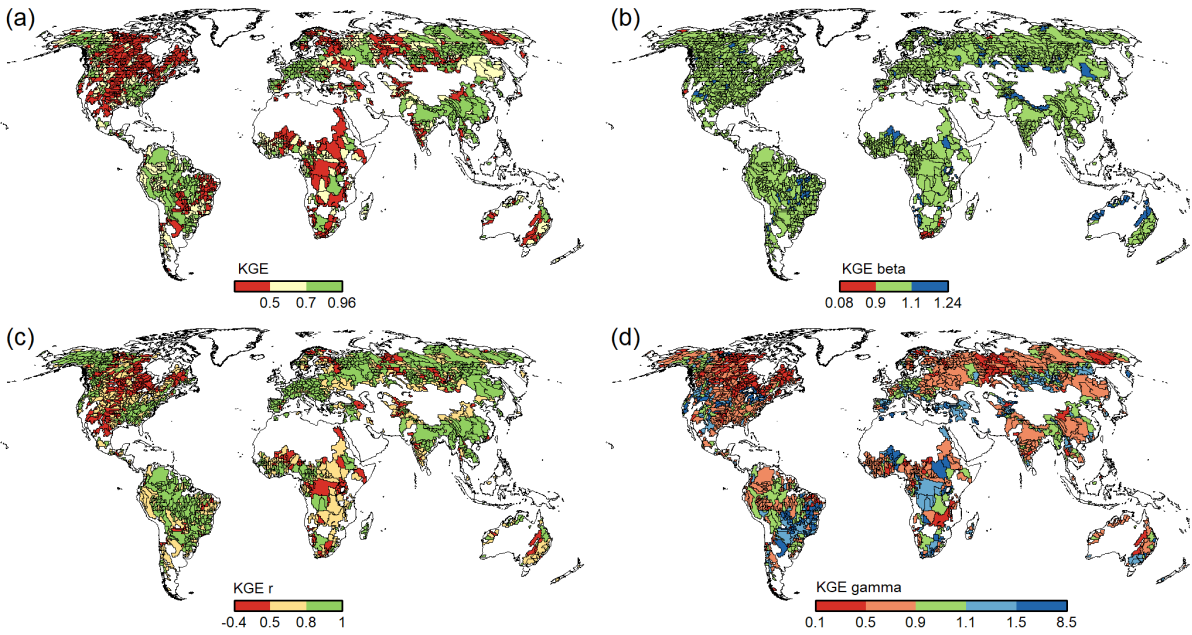

**Figure S48.** *KGE* efficiency metric and its components for calibration monthly streamflow values at the 1509 gauging stations for WaterGAP 2.2e as forced by gswp3-era5.

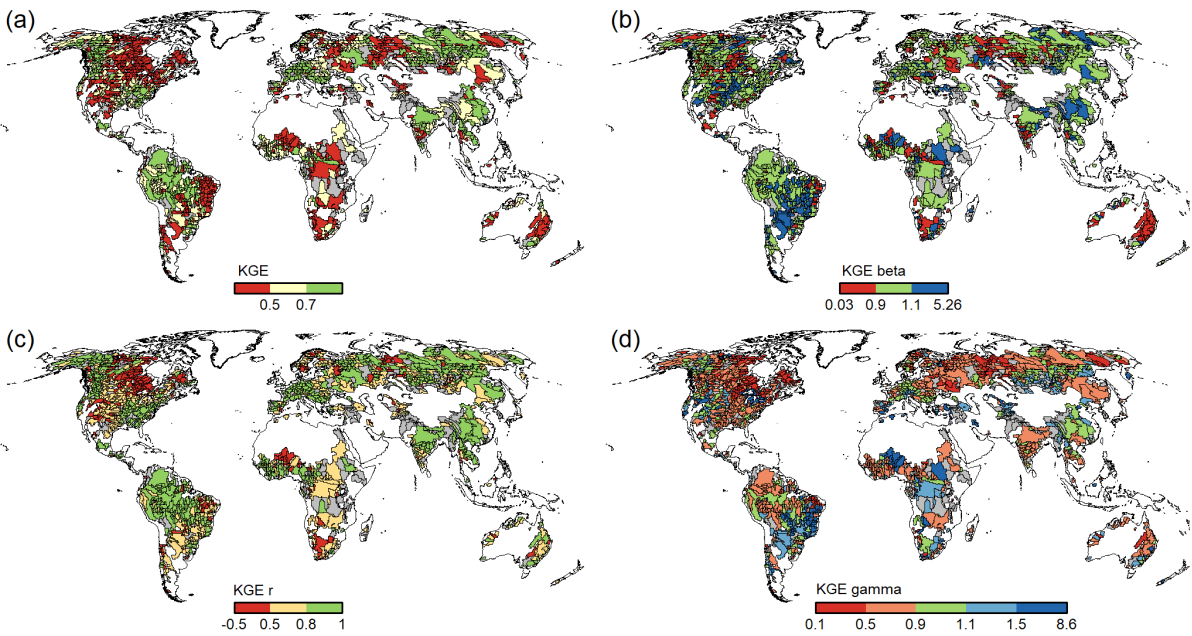

**Figure S49.** *KGE* efficiency metric and its components for validation monthly streamflow values at the 1509 gauging stations for WaterGAP 2.2e as forced by gswp3-era5. Grey colour indicate that no calculation is possible due to not available observation

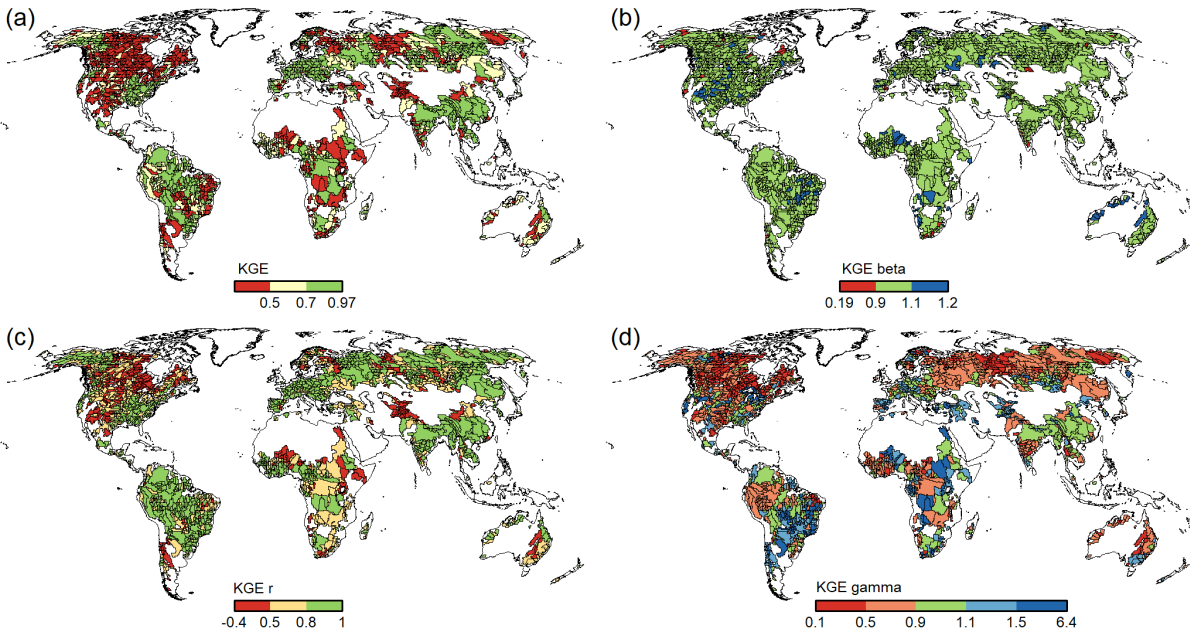

**Figure S50.** *KGE* efficiency metric and its components for calibration monthly streamflow values at the 1509 gauging stations for WaterGAP 2.2e as forced by gswp3-w5e5.

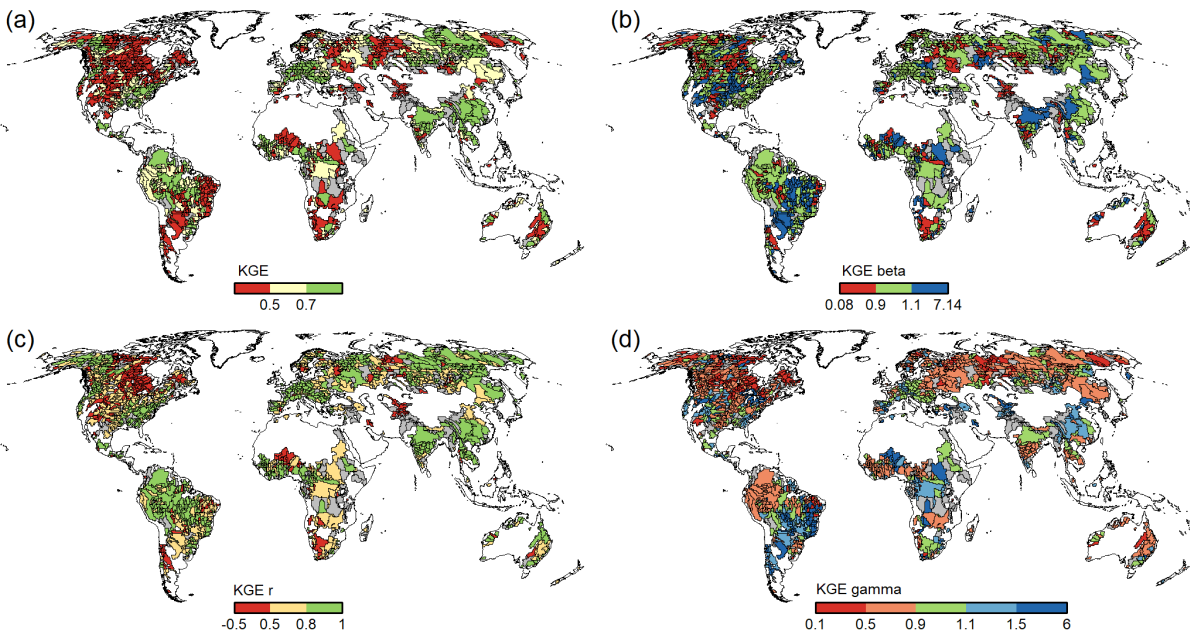

**Figure S51.** *KGE* efficiency metric and its components for validation monthly streamflow values at the 1509 gauging stations for WaterGAP 2.2e as forced by gswp3-w5e5. Grey colour indicate that no calculation is possible due to not available observation

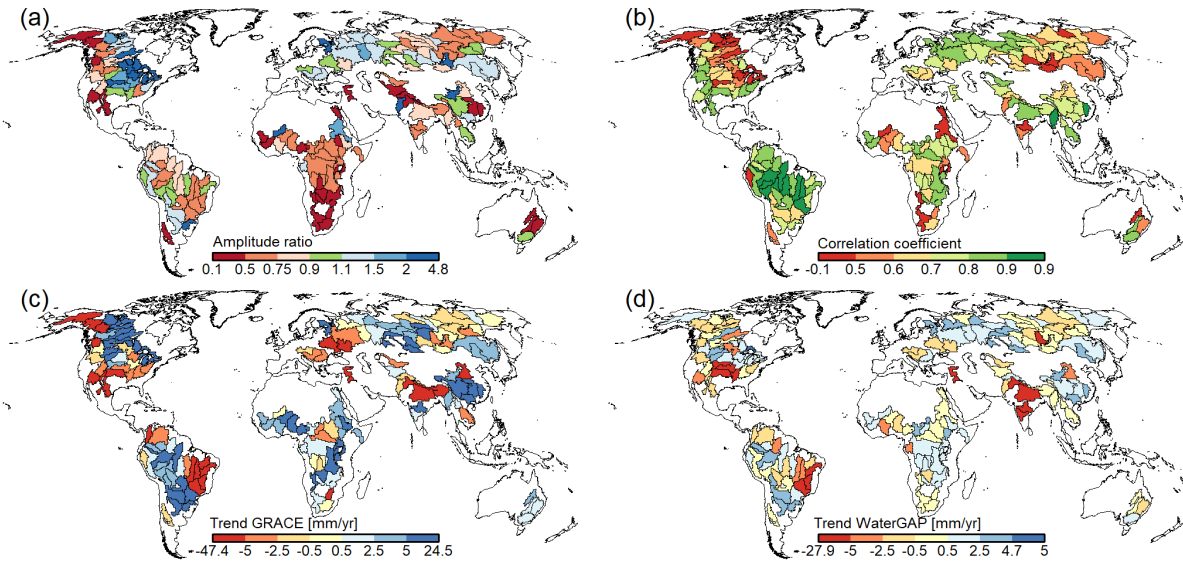

**Figure S52.** Comparison of basin-average TWSAs of WaterGAP 2.2d as forced by gswp3-w5e5 and GRACE for 148 basins larger than 200000 km<sup>2</sup>, with (a) ratio of amplitude (reddish colors indicate underestimated amplitude of WaterGAP, vice versa for bluish), (b) correlation coefficient, (c) trend of GRACE and (d) trend of WaterGAP 2.2d. All values based on the time series January 2003 - December 2019.

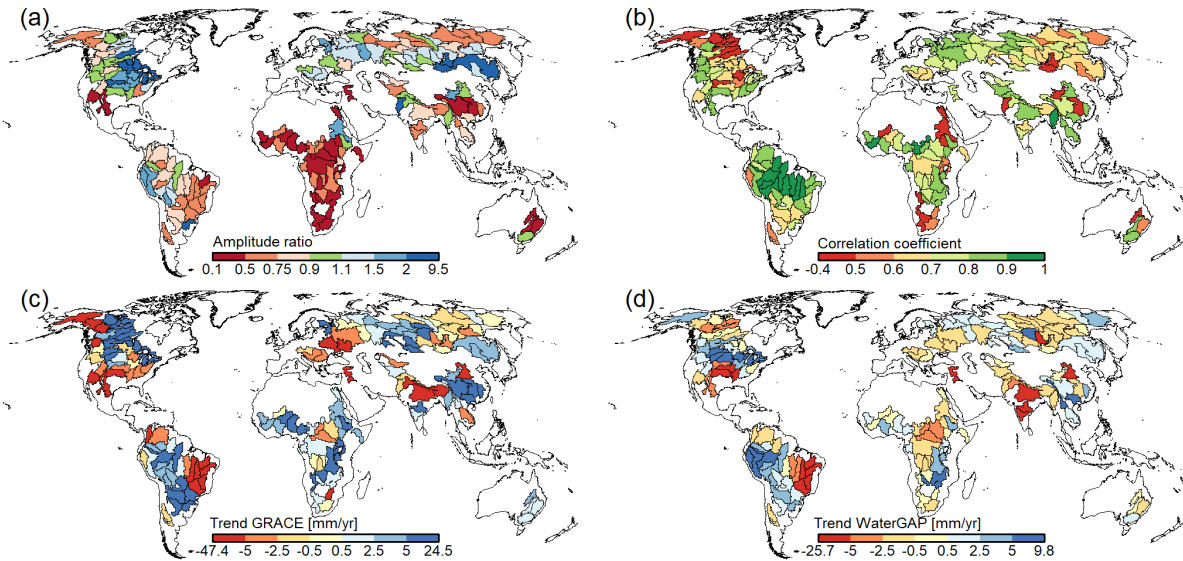

**Figure S53.** Comparison of basin-average TWSAs of WaterGAP 2.2e as forced by gswp3-era5 and GRACE for 148 basins larger than 200000 km<sup>2</sup>, with (a) ratio of amplitude (reddish colors indicate underestimated amplitude of WaterGAP, vice versa for bluish), (b) correlation coefficient, (c) trend of GRACE and (d) trend of WaterGAP 2.2e. All values based on the time series January 2003 - December 2019.

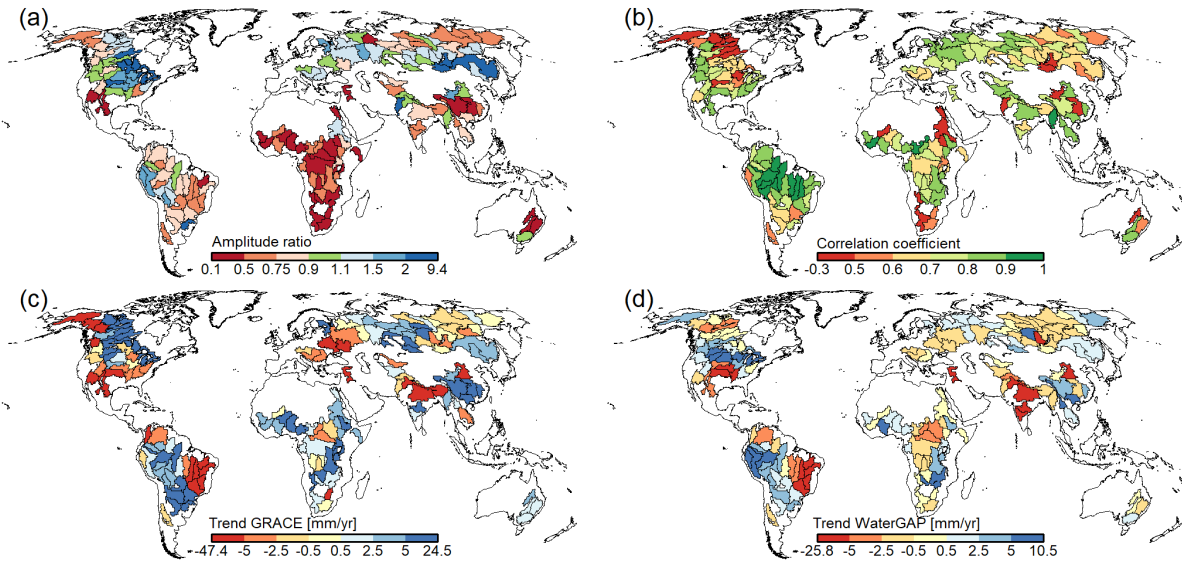

**Figure S54.** Comparison of basin-average TWSAs of WaterGAP 2.2e as forced by 20crv3-era5 and GRACE for 148 basins larger than 200000 km<sup>2</sup>, with (a) ratio of amplitude (reddish colors indicate underestimated amplitude of WaterGAP, vice versa for bluish), (b) correlation coefficient, (c) trend of GRACE and (d) trend of WaterGAP 2.2e. All values based on the time series January 2003 - December 2019.

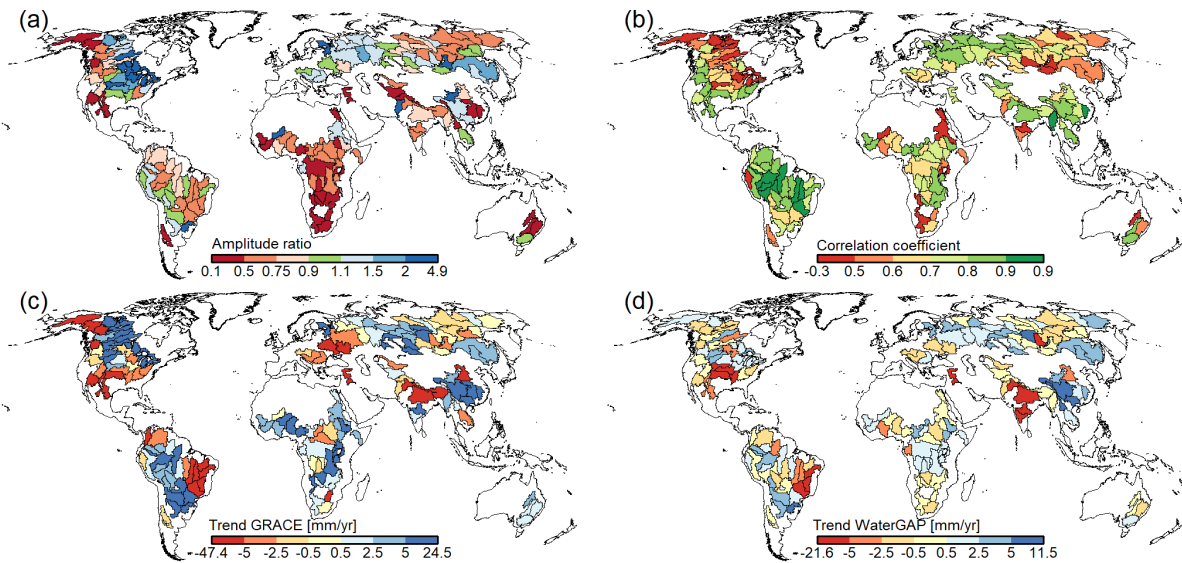

**Figure S55.** Comparison of basin-average TWSAs of WaterGAP 2.2e as forced by 20crv3-w5e5 and GRACE for 148 basins larger than 200000 km<sup>2</sup>, with (a) ratio of amplitude (reddish colors indicate underestimated amplitude of WaterGAP, vice versa for bluish), (b) correlation coefficient, (c) trend of GRACE and (d) trend of WaterGAP 2.2e. All values based on the time series January 2003 - December 2019.

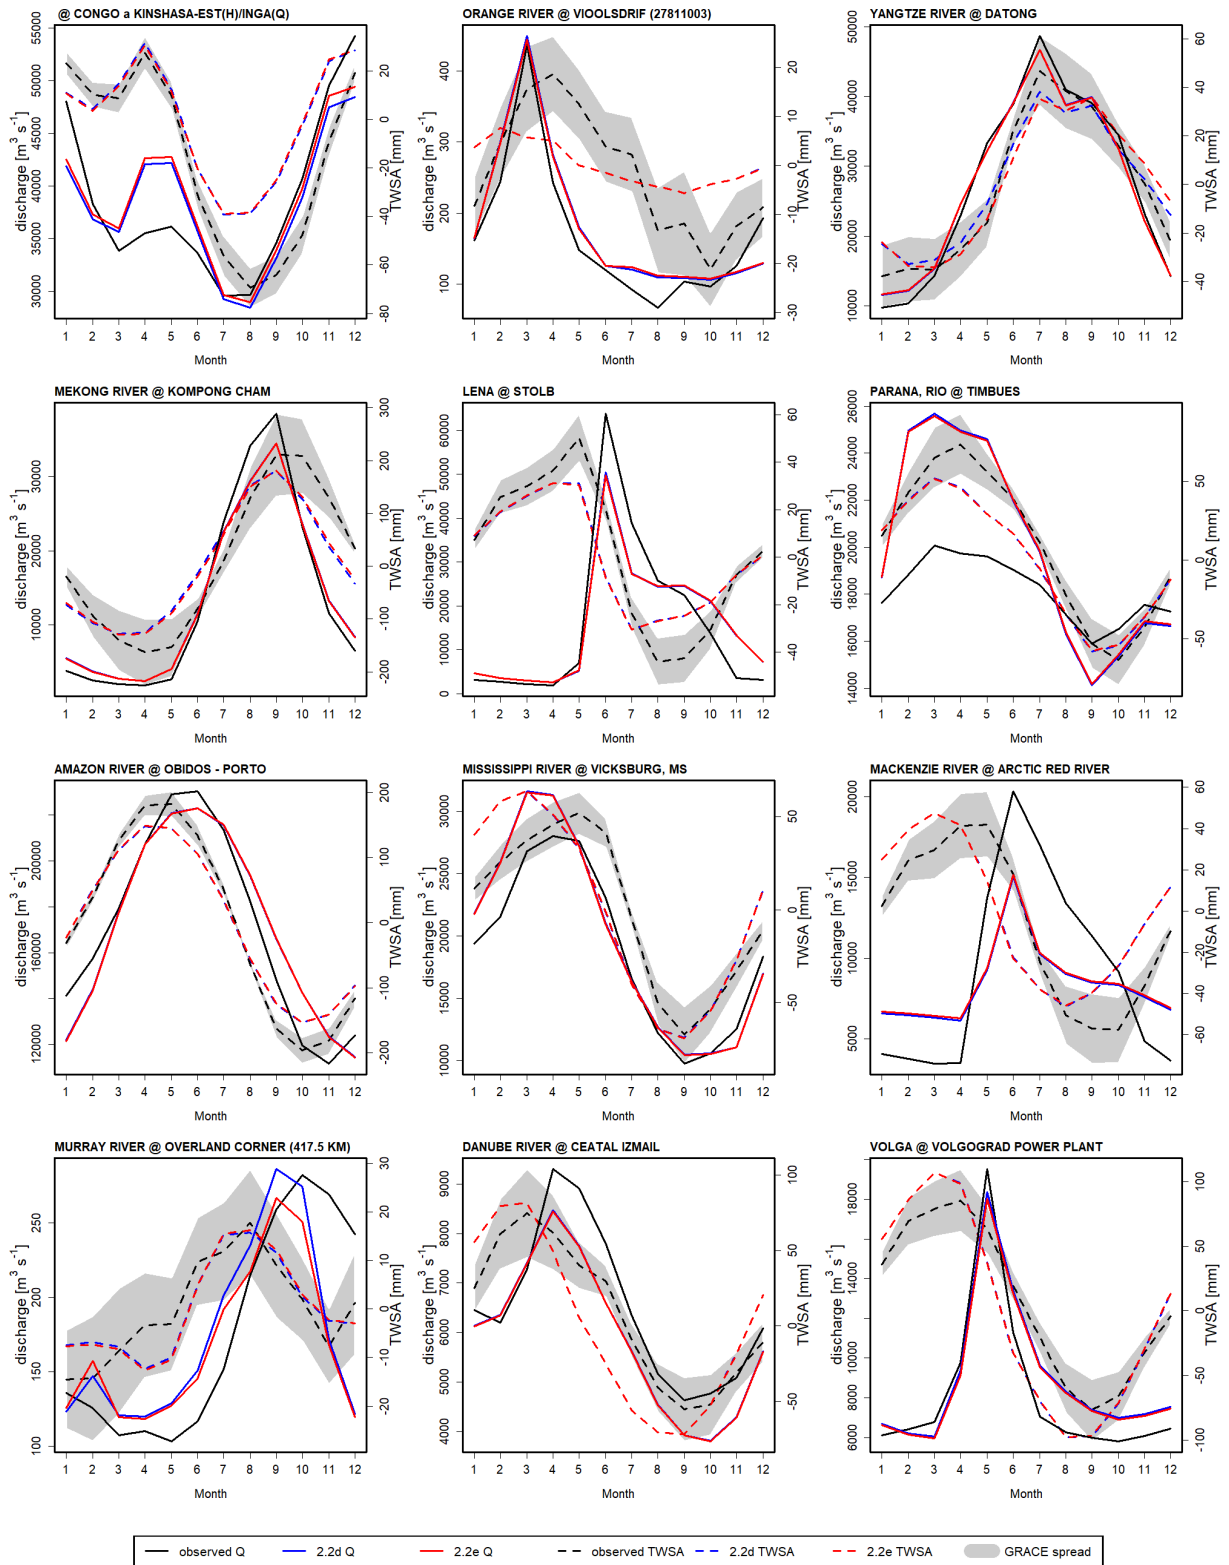

**Figure S56.** Seasonality of streamflow and TWSAs of selected large river basins: model results of WaterGAP 2.2e and WaterGAP 2.2d with gswp3-w5e5 as forcing as well as streamflow and TWSA observations.

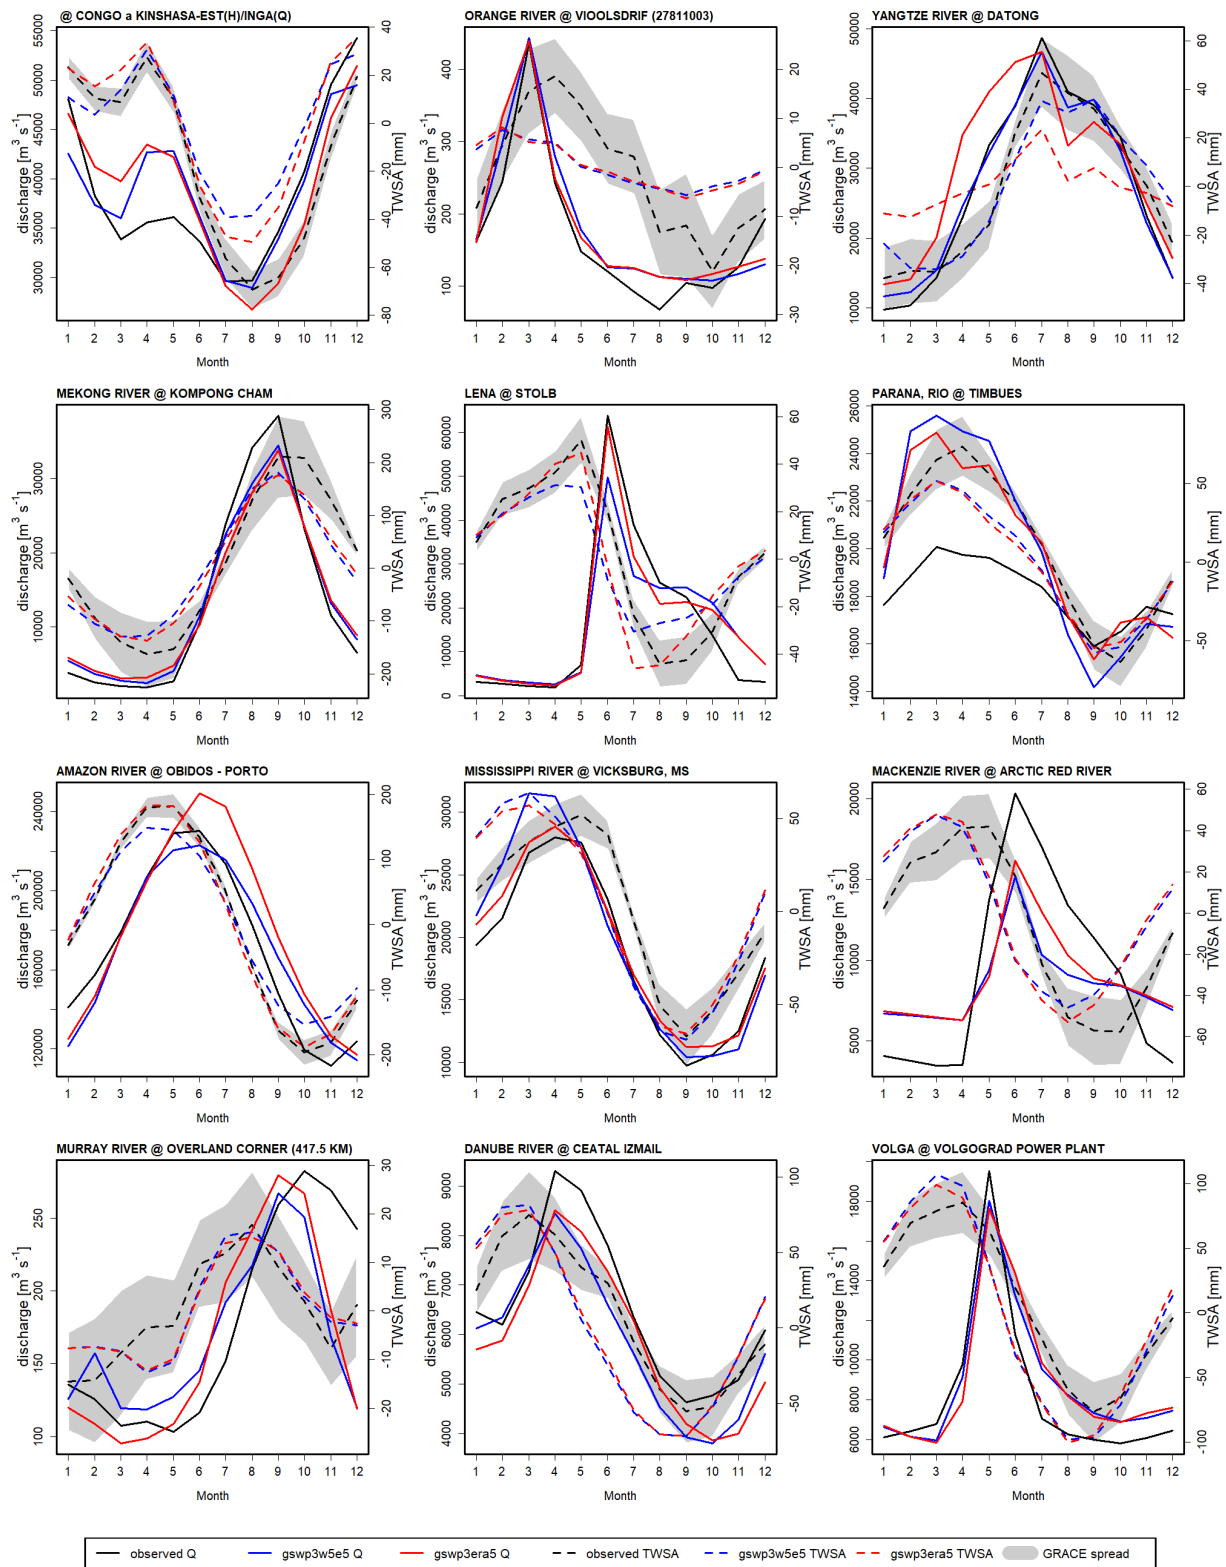

**Figure S57.** Seasonality of streamflow and TWSAs of selected large river basins: model results of WaterGAP 2.2e with gswp3-w5e5 and gswp3-era5 as forcing as well as streamflow and TWSA observations.

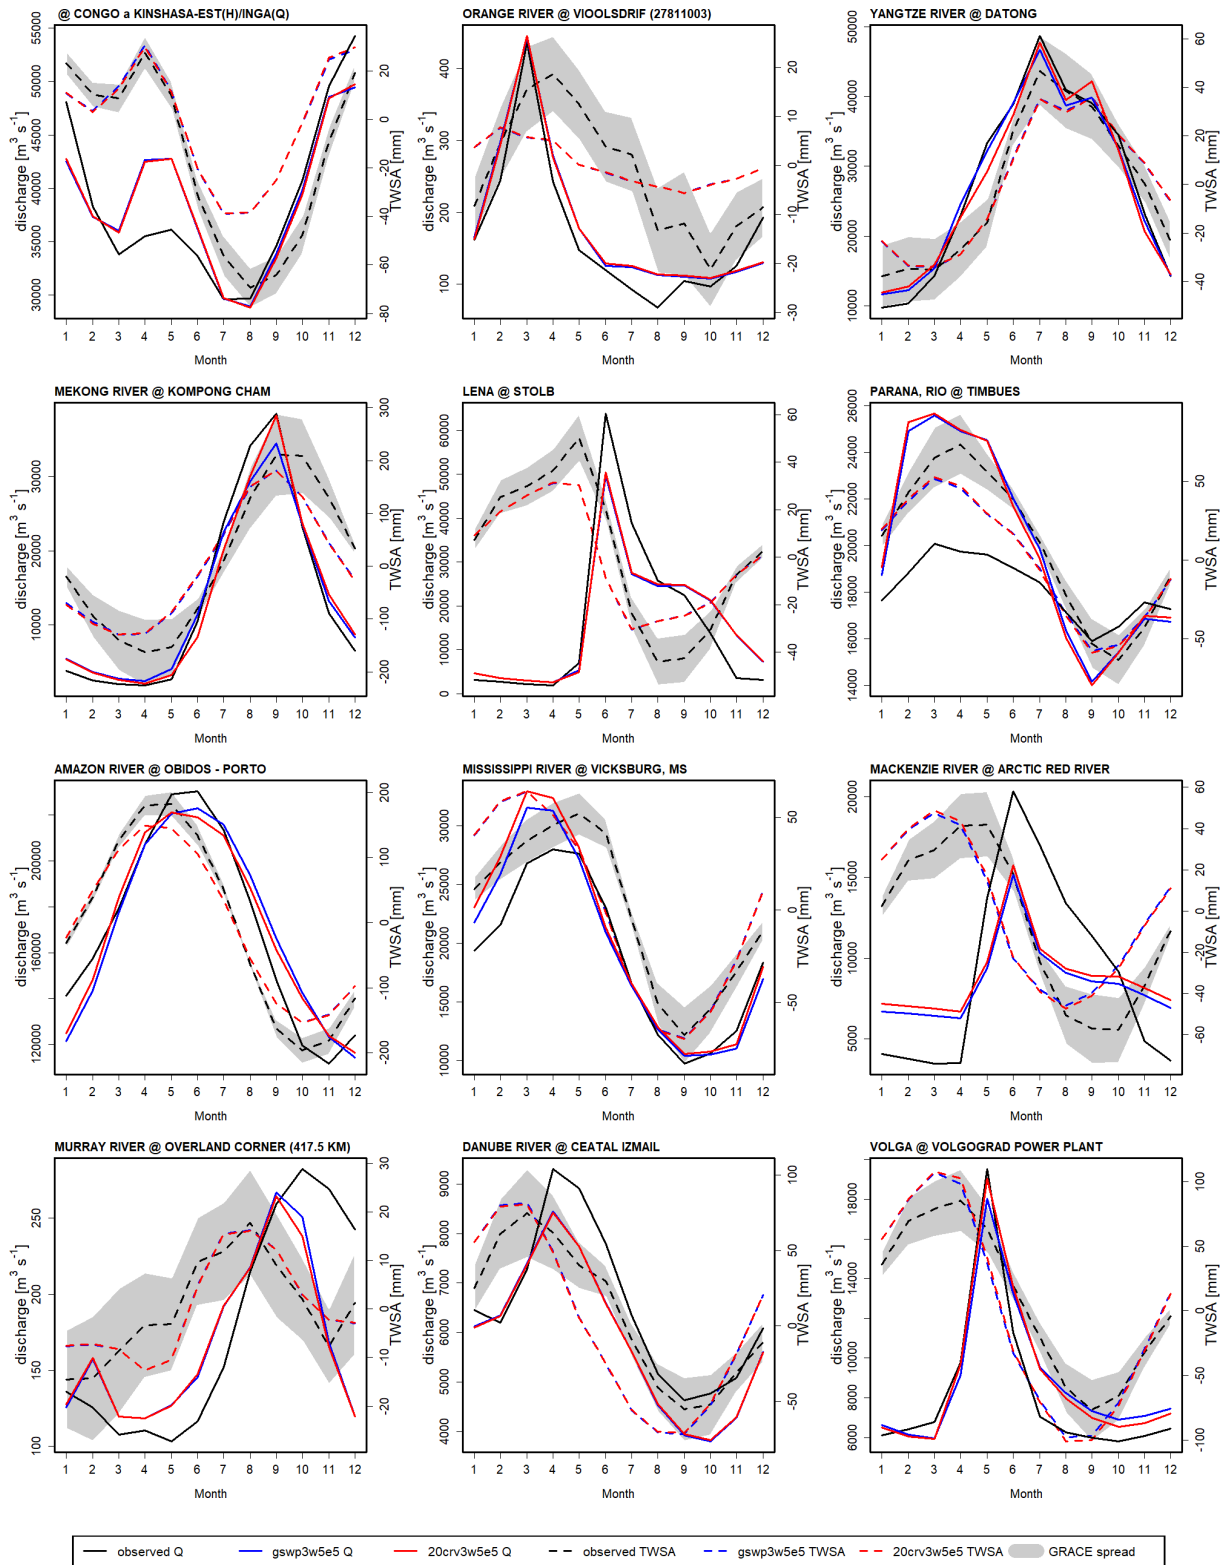

Figure S58. Seasonality of streamflow and TWSAs of selected large river basins: model results of WaterGAP 2.2e with gswp3-w5e5 and 20crv3-w5e5 as forcing as well as streamflow and TWSA observations.



## References

- Bureau of Reclamation: Hydromet Historical Data Access, <https://www.usbr.gov/pn/hydromet/arcread.html>.
- California Department of Water Resources: California Data Exchange Center, <https://cdec.water.ca.gov/misc/resinfo.html>.
- FAO: AQUASTAT, <https://www.fao.org/aquastat/en/databases/maindatabase>, 2023.
- Müller Schmied, H., Cáceres, D., Eisner, S., Flörke, M., Herbert, C., Niemann, C., Peiris, T. A., Popat, E., Portmann, F. T., Reinecke, R., Schumacher, M., Shadkam, S., Telteu, C.-E., Trautmann, T., and Döll, P.: The global water resources and use model WaterGAP v2.2d: model description and evaluation, *Geoscientific Model Development*, 14, 1037–1079, <https://doi.org/10.5194/gmd-14-1037-2021>, <https://gmd.copernicus.org/articles/14/1037/2021/>, 2021.
- Texas Water Development Board: Water Data for Texas, <https://waterdatafortexas.org/reservoirs/statewide>.
